# Supplementary material for: Primary amines from lignocellulose by direct amination of alcohol intermediates, catalyzed by RANEY® Ni
Source: Royal Society of Chemistry journal article supplement (doi:10.1039/d2cy00864e), 2022-01-01
Supplement: d2cy00864e1.pdf [file d2cy00864e1.pdf]

# Supplementary information

## Primary amines from lignocellulose by direct amination of alcohol intermediates, catalyzed by Raney Ni

Xianyuan Wu<sup>1</sup>, Mario De bruyn<sup>2</sup>, and Katalin Barta<sup>1,2\*</sup>

<sup>1</sup> Stratingh Institute for Chemistry, University of Groningen, Nijenborgh 4, 9747 AG, The Netherlands

<sup>2</sup> Institute for Chemistry, University of Graz, Heinrichstrasse 28/II, 8010, Graz, Austria

\*Correspondence: Katalin Barta ([k.barta@rug.nl](mailto:k.barta@rug.nl), [katalin.barta@uni-graz.at](mailto:katalin.barta@uni-graz.at))

# Table of contents

|                                                                                                                                                    |    |
|----------------------------------------------------------------------------------------------------------------------------------------------------|----|
| 1. Calculation of conversion, selectivity and yield .....                                                                                          | 3  |
| 2. Additional supporting information to the identification of the optimal reaction conditions<br>for the Raney nickel catalyzed 1G amination ..... | 3  |
| 3. Assigned GC-FID traces for the Raney nickel catalyzed 1G amination .....                                                                        | 5  |
| 4. Supporting $^1\text{H}$ and $^{13}\text{C}$ NMR spectra.....                                                                                    | 6  |
| 5. List of the spectral and spectrometric data of the isolated compounds .....                                                                     | 30 |

## 1. Calculation of conversion, selectivity and yield

For the calculation of conversion based on GC:

$$\text{Conversion (\%)} = \frac{\text{Sum of all the product peak areas}}{[(\text{Sum of all the product peak areas}) + \text{the peak area of the remaining}] \times 100\%}$$

For the calculation of selectivity based on GC:

$$\text{Selectivity (\%)} = \frac{\text{The peak area of the target product}}{\text{Sum of all the product peak areas}} \times 100\%$$

For the calculation of yield based on GC:

$$\text{Yield (\%)} = \text{selectivity} \times \text{conversion}$$

Isolated yield (%) is based on the effective dry weight of an HCl salt of target amine

## 2. Additional supporting information to the identification of the optimal reaction conditions for the Raney nickel catalyzed 1G amination

**Table S1.** Performance of a range of commercially available heterogeneous catalysts in the catalytic amination of **1G** to **1G amine** using ammonia.<sup>[a]</sup>

| Entry | catalyst                                            | Conv. <sup>[b]</sup><br>(%) | Sel. (%) <sup>[b]</sup> |                            |                       |                     |                               | GC/isolated<br>Yield <sup>[b]</sup><br>(%) |
|-------|-----------------------------------------------------|-----------------------------|-------------------------|----------------------------|-----------------------|---------------------|-------------------------------|--------------------------------------------|
|       |                                                     |                             | <b>1G<br/>amine</b>     | <b>4-Ethy<br/>guaiacol</b> | <b>1G<br/>nitrile</b> | <b>1G<br/>amide</b> | <b>1G<br/>dimer<br/>amine</b> |                                            |
| 1     | Pd/C                                                | 2.7                         | -                       | -                          | 98.8                  | 1.2                 | -                             | -                                          |
| 2     | Pt/C                                                | 1.8                         | -                       | -                          | 97.6                  | 2.4                 | -                             | -                                          |
| 3     | Rh/C                                                | 1.2                         | -                       | -                          | 98.5                  | 1.5                 | -                             | -                                          |
| 4     | Ru/Al <sub>2</sub> O <sub>3</sub>                   | 0.8                         | -                       | -                          | 98.5                  | 1.5                 | -                             | -                                          |
| 5     | Ni/SiO <sub>2</sub> -Al <sub>2</sub> O <sub>3</sub> | 6.6                         | -                       | 7.2                        | 92.8                  | -                   | -                             | -                                          |
| 6     | Ni/SiO <sub>2</sub>                                 | 5.9                         | -                       | 6.7                        | 93.3                  | -                   | -                             | -                                          |
| 7     | Raney Ni                                            | 87.6                        | 91.4                    | 4.5                        | -                     | 1.0                 | 1.4                           | 74.7 (69.8) <sup>[c]</sup>                 |

[a]. Reaction conditions: 0.5 mmol **1G**, 100 mg catalyst, 2.5 mL *t*-amyl alcohol, 150 °C, 7 bar NH<sub>3</sub>, 18 h

[b]. Conversion, selectivity, and yield were all determined by GC-FID

[c]. Isolated yield in parentheses

**Table S2.** Influence of the reaction temperature on the catalytic amination of **1G** to **1G amine** using ammonia.<sup>[a]</sup>

| Entry | Temp.<br>(°C) | Conv. <sup>[b]</sup><br>(%) | Sel. (%) <sup>[b]</sup> |                            |                       |                     |                               | Isolated<br>yield <sup>[c]</sup><br>(%) |
|-------|---------------|-----------------------------|-------------------------|----------------------------|-----------------------|---------------------|-------------------------------|-----------------------------------------|
|       |               |                             | <b>1G<br/>amine</b>     | <b>4-ethy<br/>guaiacol</b> | <b>1G<br/>nitrile</b> | <b>1G<br/>amide</b> | <b>1G<br/>dimer<br/>amine</b> |                                         |
| 1     | 120           | 1.4                         | 45.2                    | 21.0                       | 1.4                   | 32.4                | -                             | 0                                       |
| 2     | 130           | 44.6                        | 90.6                    | 3.5                        | -                     | 1.9                 | 4.0                           | 33.1                                    |
| 3     | 140           | 73.7                        | 88.9                    | 4.7                        | -                     | 3.3                 | 3.1                           | 49.6                                    |
| 4     | 150           | 87.6                        | 91.4                    | 4.5                        | -                     | 2.7                 | 1.4                           | 69.8                                    |
| 5     | 160           | 94.6                        | 90.2                    | 6.3                        | -                     | 2.3                 | 1.2                           | 75.8                                    |

[a]. Reaction conditions: 0.5 mmol **1G**, 100 mg Raney Ni, 2.5 mL *t*-amyl alcohol, 120-160 °C, 7 bar NH<sub>3</sub>, 18 h [b]. Conversion and selectivity were all determined by GC-FID

**Table S3.** Influence of the reaction time on the catalytic amination of **1G** to **1G amine** using ammonia.<sup>[a]</sup>

| Entry | Time (h) | Conv. <sup>[b]</sup> (%) | Sel. (%) <sup>[b]</sup> |                        |                   |                 |                       | Isolated yield <sup>[c]</sup> (%) |
|-------|----------|--------------------------|-------------------------|------------------------|-------------------|-----------------|-----------------------|-----------------------------------|
|       |          |                          | <b>1G amine</b>         | <b>4-ethy guaiacol</b> | <b>1G nitrile</b> | <b>1G amide</b> | <b>1G dimer amine</b> |                                   |
| 1     | 1        | 15.9                     | 85.8                    | 7.8                    | 1.3               | 4.9             | 0.2                   | 5.8                               |
| 2     | 3        | 45.5                     | 84.2                    | 6.1                    | 1.1               | 4.3             | 4.3                   | 28.2                              |
| 3     | 5        | 58.2                     | 83.9                    | 6.1                    | 0.8               | 5.4             | 3.8                   | 37.6                              |
| 4     | 8        | 69.5                     | 84.4                    | 5.7                    | 0.6               | 6.6             | 2.7                   | 54.2                              |
| 5     | 12       | 86.6                     | 87.8                    | 4.7                    | 0.5               | 3.6             | 3.4                   | 61.7                              |
| 6     | 18       | 94.6                     | 90.2                    | 6.3                    | -                 | 2.3             | 1.2                   | 75.8                              |

[a]. Reaction conditions: 0.5 mmol **1G**, 100 mg Raney Ni, 2.5 mL *t*-amyl alcohol, 160 °C, 7 bar NH<sub>3</sub>, 1-18 h

[b]. Conversion and selectivity were all determined by GC-FID

**Table S4.** Influence of ammonia pressure on the catalytic amination of **1G** to **1G amine** using ammonia.<sup>[a]</sup>

| Entry | Ammonia pressure (Bar) | Conv. <sup>[b]</sup> (%) | Sel. (%) <sup>[b]</sup> |                        |                   |                 |                       | Isolated yield <sup>[c]</sup> (%) |
|-------|------------------------|--------------------------|-------------------------|------------------------|-------------------|-----------------|-----------------------|-----------------------------------|
|       |                        |                          | <b>1G amine</b>         | <b>4-ethy guaiacol</b> | <b>1G nitrile</b> | <b>1G amide</b> | <b>1G dimer amine</b> |                                   |
| 1     | Atmospheric Pressure   | 70                       | -                       | > 99                   | -                 | -               | -                     | -                                 |
| 2     | 7                      | 94.6                     | 90.2                    | 6.3                    | -                 | 2.3             | 1.2                   | 75.8                              |

[a]. Reaction conditions: 0.5 mmol **1G**, 100 mg Raney Ni, 2.5 mL *t*-amyl alcohol, 160 °C, atmospheric pressure and 7 bar NH<sub>3</sub>, 18 h.

[b]. Conversion and selectivity were all determined by GC-FID

**Table S5.** Influence of catalyst loading on the catalytic amination of **1G** to **1G amine** using ammonia.<sup>[a]</sup>

| Entry | Catalys loading | Conv. <sup>[b]</sup> (%) | Sel. (%) <sup>[b]</sup> |                        |                   |                 |                       | Isolated yield <sup>[c]</sup> (%) |
|-------|-----------------|--------------------------|-------------------------|------------------------|-------------------|-----------------|-----------------------|-----------------------------------|
|       |                 |                          | <b>1G amine</b>         | <b>4-ethy guaiacol</b> | <b>1G nitrile</b> | <b>1G amide</b> | <b>1G dimer amine</b> |                                   |
| 1     | 20              | 25.8                     | 88.6                    | 6.0                    | -                 | 3.8             | 1.6                   | 10.7                              |
| 2     | 50              | 66.2                     | 87.8                    | 5.6                    | -                 | 4.6             | 2.0                   | 40.3                              |
| 3     | 100             | 94.6                     | 90.2                    | 6.3                    | -                 | 2.3             | 1.2                   | 75.8                              |

[a]. Reaction conditions: 0.5 mmol **1G**, 20-100 mg Raney Ni, 2.5 mL *t*-amyl alcohol, 160 °C, 7 bar NH<sub>3</sub>, 18 h.

[b]. Conversion and selectivity were all determined by GC-FID

**Table S6.** Influence of substrate loading on the catalytic amination of **1G** to **1G amine** using ammonia.<sup>[a]</sup>

| Entry | substrate loading (mg) | Conv. <sup>[b]</sup> (%) | Sel. (%) <sup>[b]</sup> |                        |                   |                 |                       | Isolated yield <sup>[c]</sup> (%) |
|-------|------------------------|--------------------------|-------------------------|------------------------|-------------------|-----------------|-----------------------|-----------------------------------|
|       |                        |                          | <b>1G amine</b>         | <b>4-ethy guaiacol</b> | <b>1G nitrile</b> | <b>1G amide</b> | <b>1G dimer amine</b> |                                   |
| 1     | 500                    | 86.6                     | 80.5                    | 14.4                   | 0                 | 2.8             | 4.4                   | 55.8                              |

[a]. Reaction conditions: 500 mg **1G**, 500 mg Raney Ni, 8 mL *t*-amyl alcohol, 160 °C and 7 bar NH<sub>3</sub>, 18 h.

---

[b]. Conversion and selectivity were all determined by GC-FID

---

### 3. Assigned GC-FID traces for the Raney nickel catalyzed **1G** amination

**Figure S1.** GC-FID traces for the Raney nickel catalyzed **1G** amination. Reaction conditions: A) 100 mg Raney nickel catalyst, 0.5 mmol **1G**, 2.5 mL *t*-amyl alcohol, 7 bar NH<sub>3</sub>, 160 °C, 3 h. B) 100 mg Raney nickel catalyst, 0.5 mmol **1G**, 2.5 mL *t*-amyl alcohol, 7 bar NH<sub>3</sub>, 160 °C, 18 h.

#### 4. Supporting $^1\text{H}$ and $^{13}\text{C}$ NMR spectra

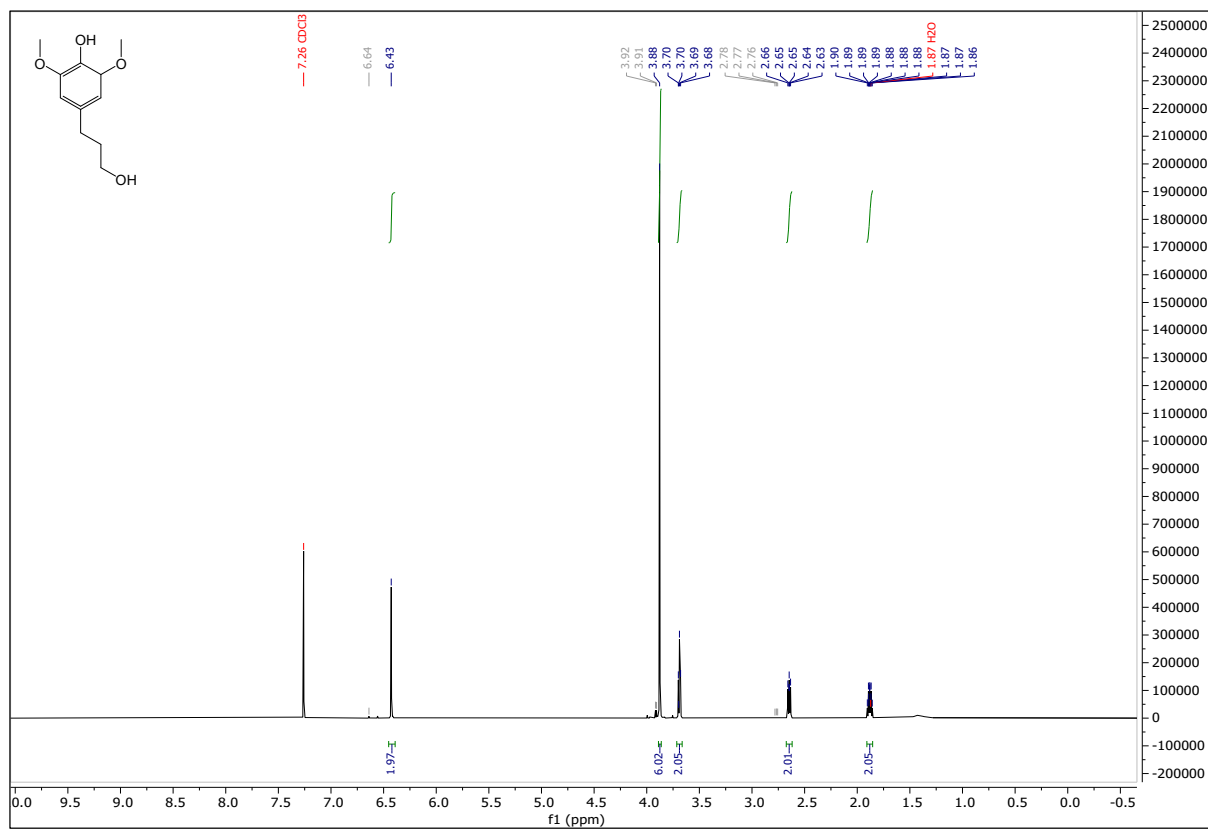

Figure S2.  $^1\text{H}$  NMR spectrum of 1S.

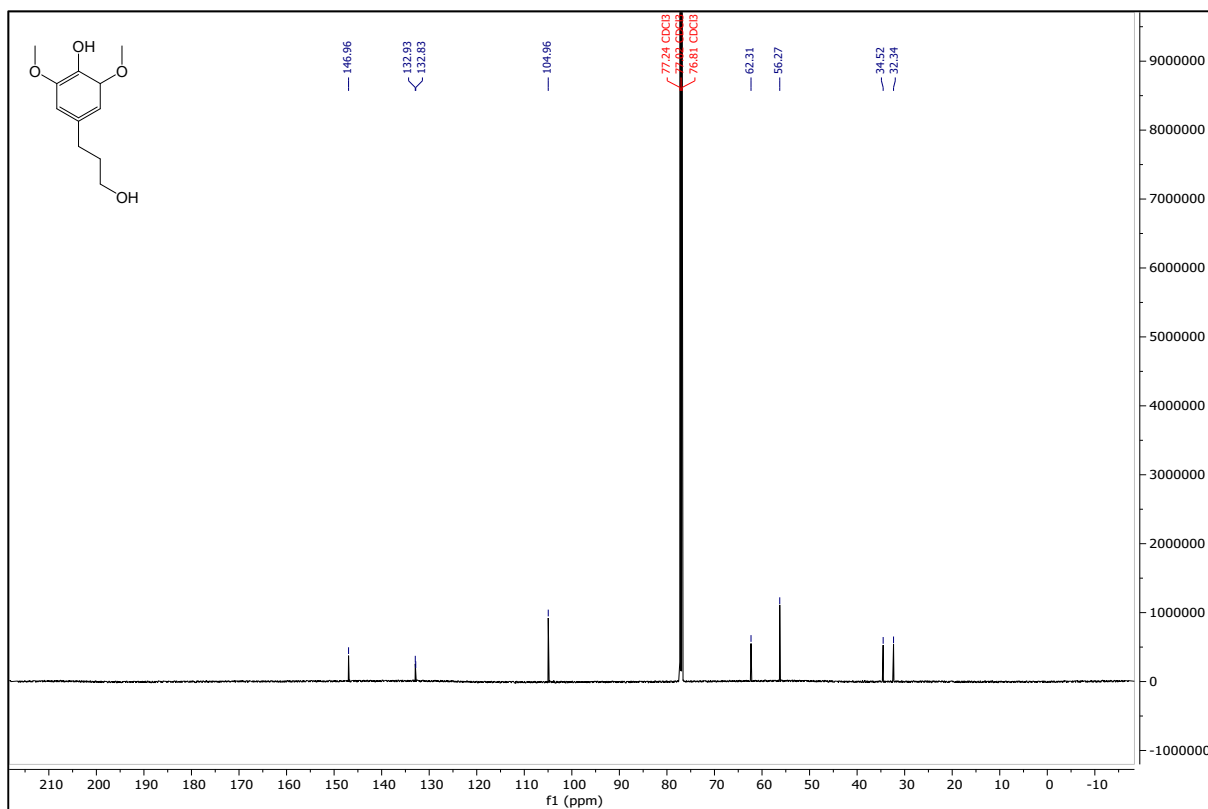

Figure S3. <sup>13</sup>C NMR spectrum of 1S.

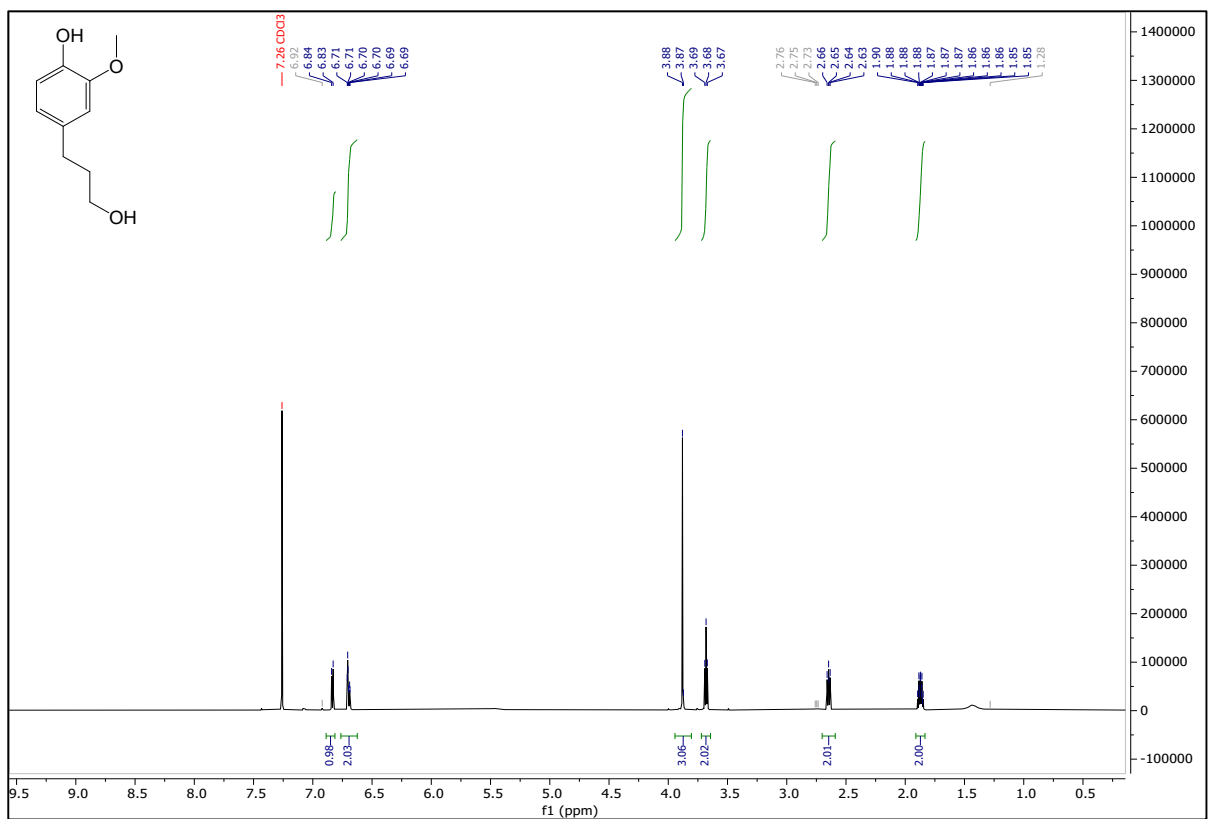

Figure S4. <sup>1</sup>H NMR spectrum of 1G.

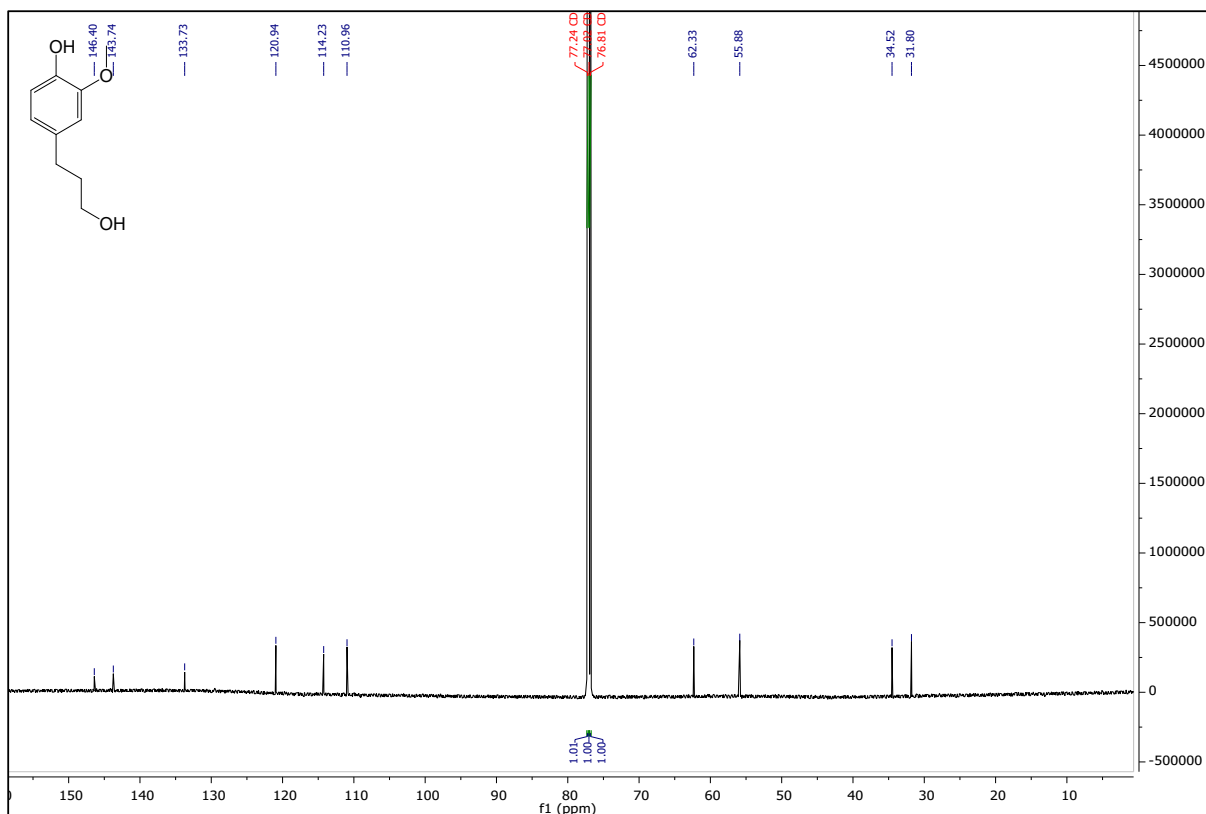

Figure S5. <sup>13</sup>C NMR spectrum of 1G.

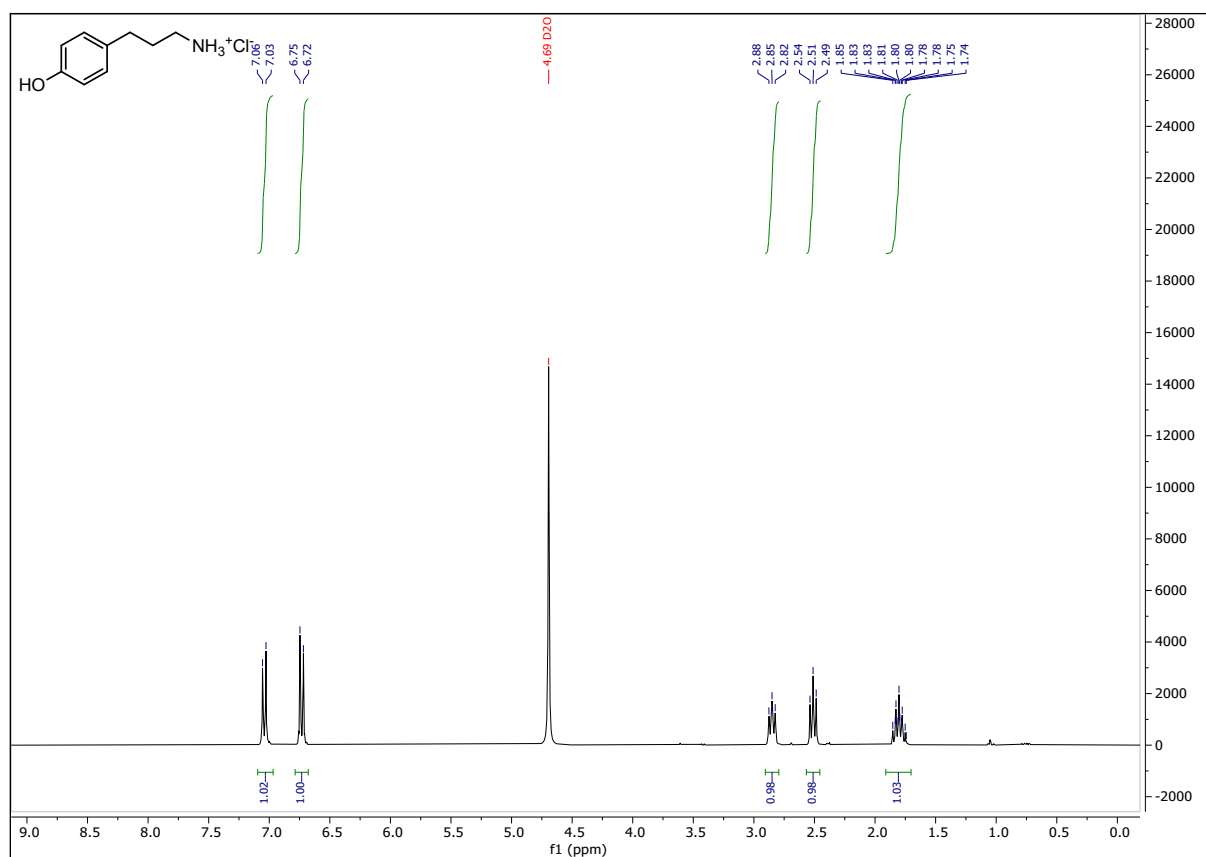

Figure S6. <sup>1</sup>H NMR spectrum of 1H amine (as the HCl ammonium salt)



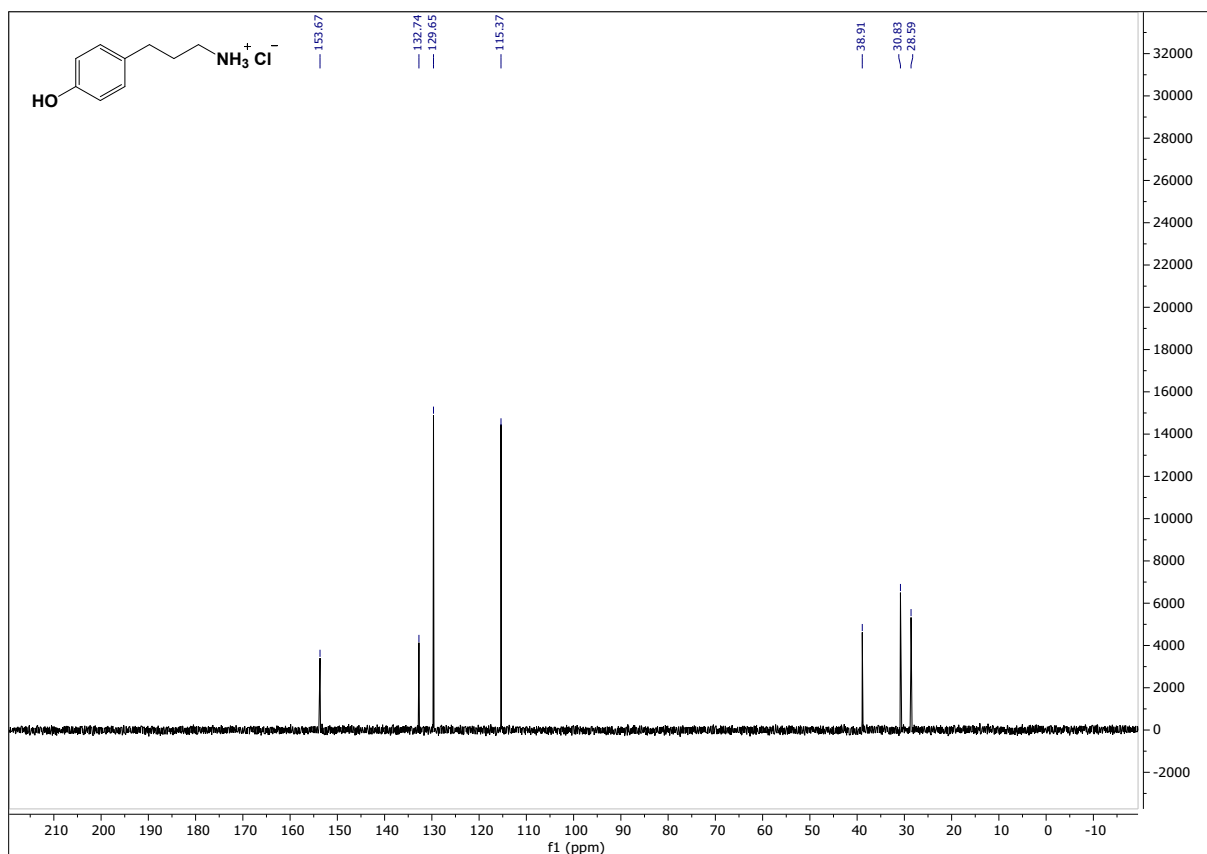

Figure S7.  $^{13}\text{C}$  NMR spectrum of 1H amine (as the HCl ammonium salt)

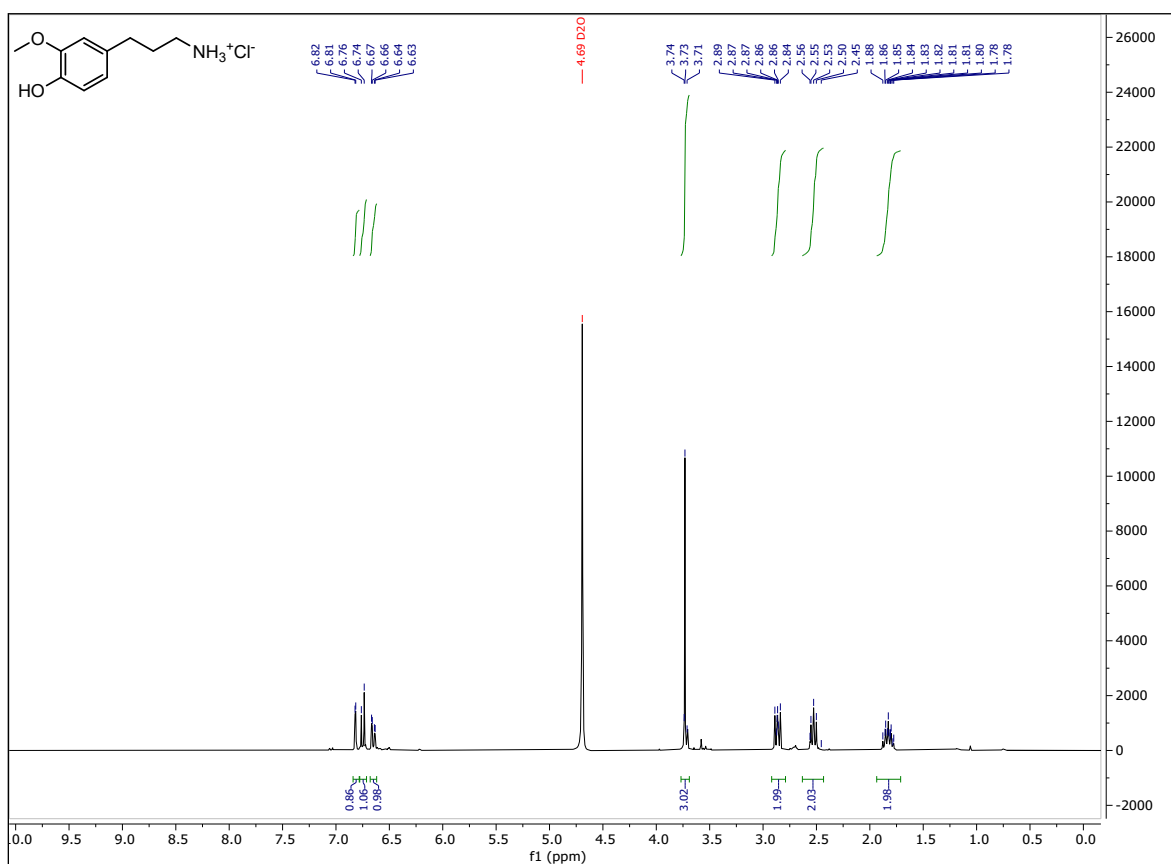

Figure S8.  $^1\text{H}$  NMR spectrum of 1G amine (as the HCl ammonium salt)

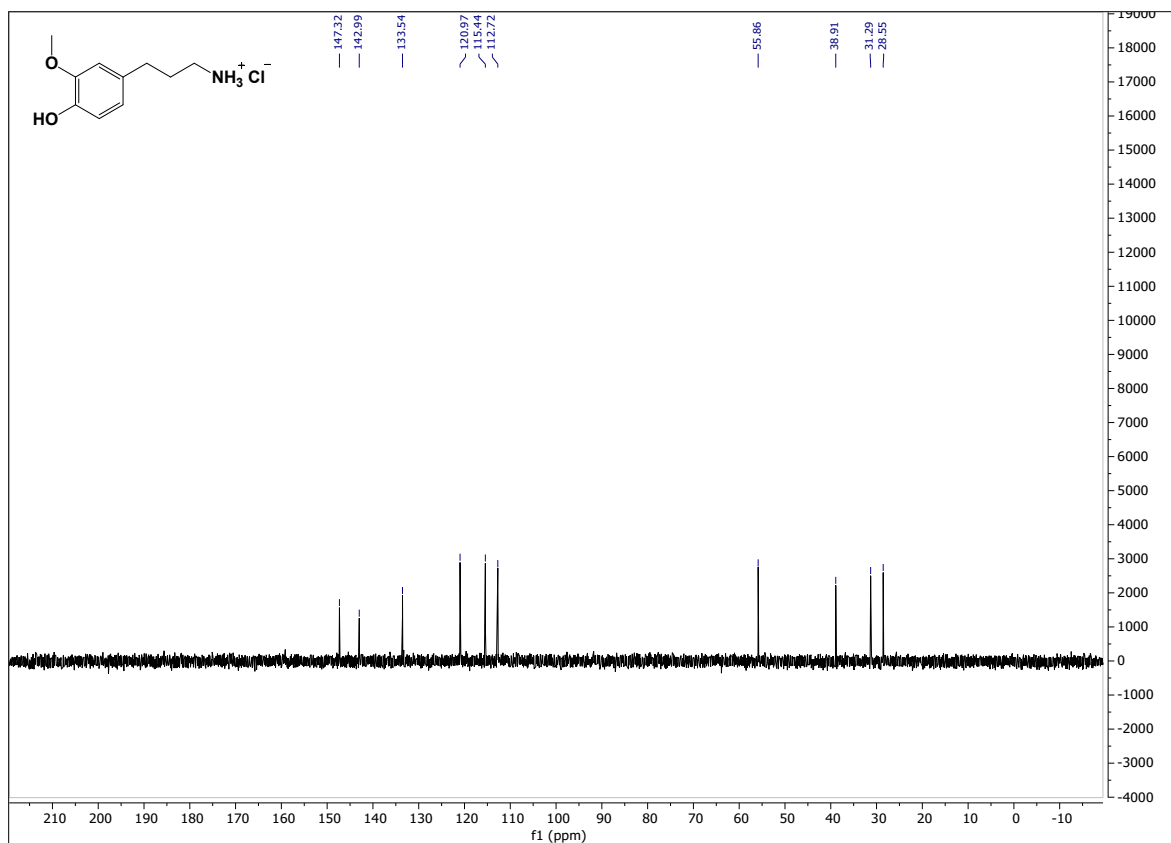

Figure S9. <sup>13</sup>C NMR spectrum of **1G amine** (as the HCl ammonium salt)

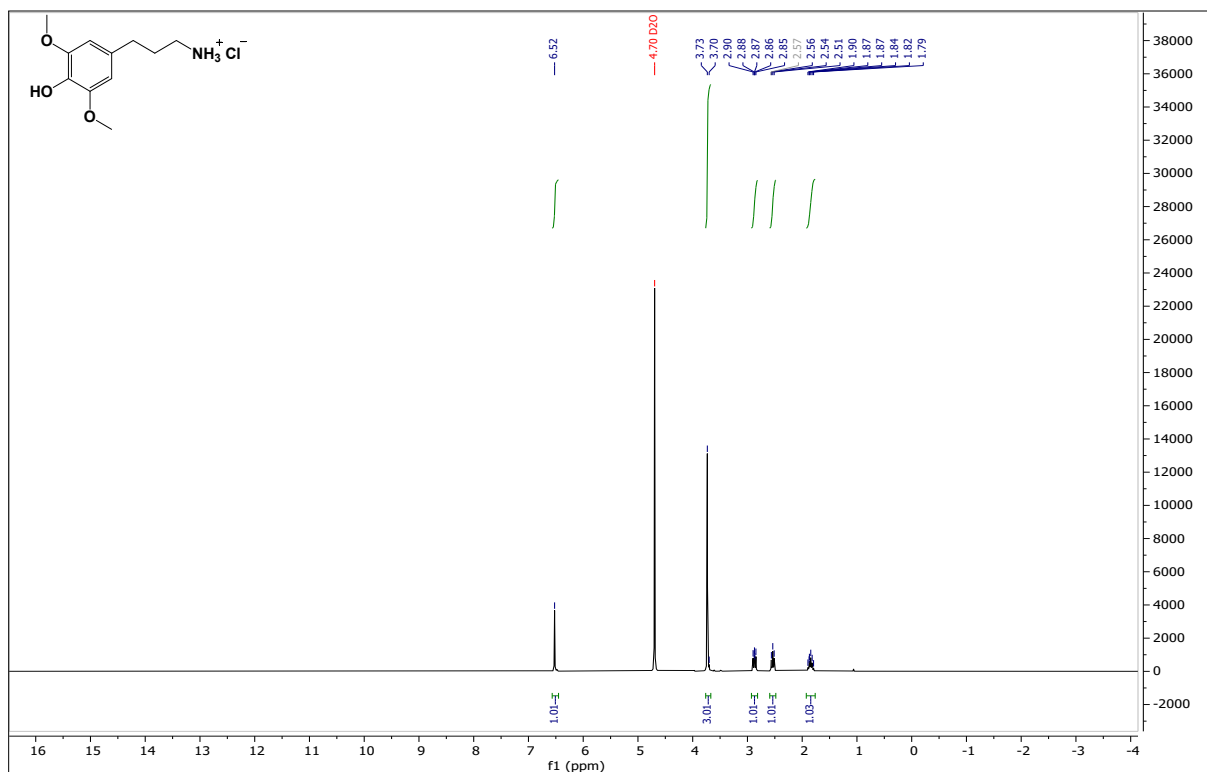

Figure S10. <sup>1</sup>H NMR spectrum of **1S amine** (as the HCl ammonium salt)

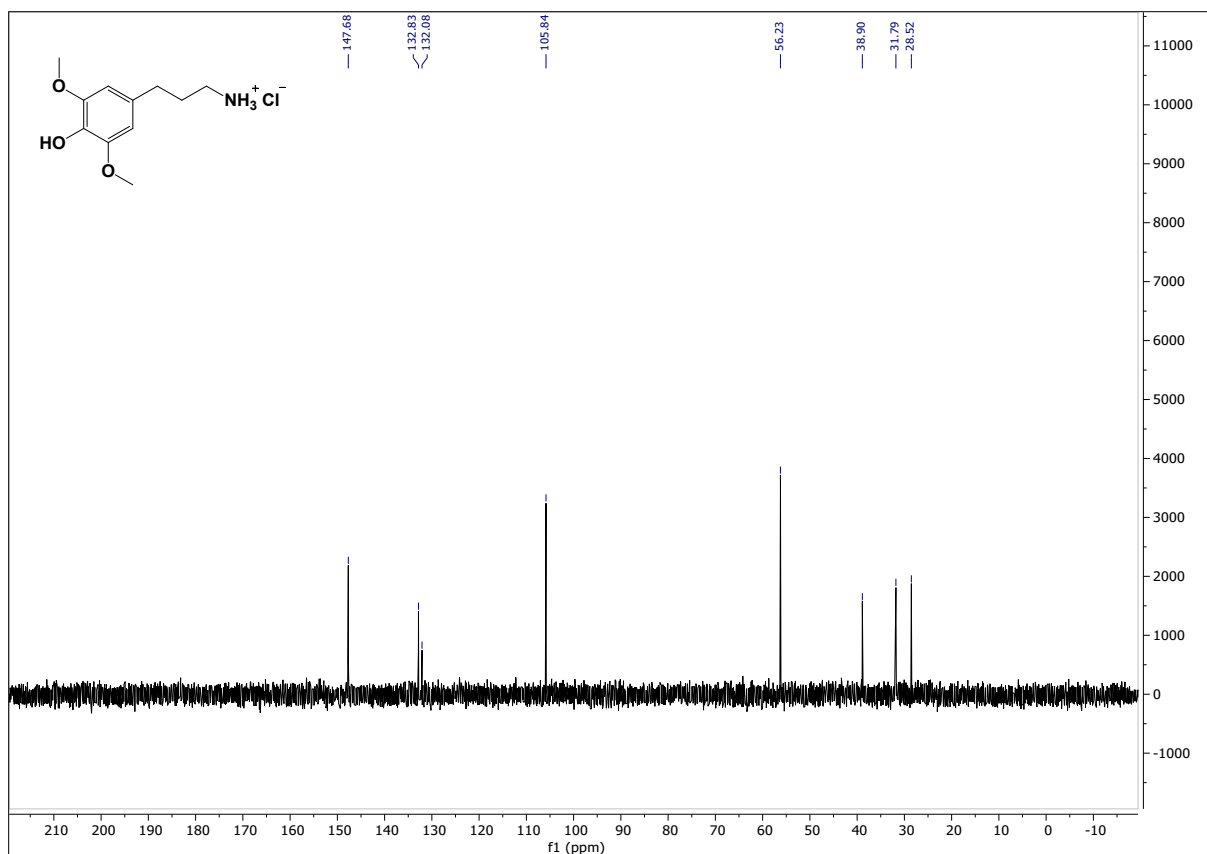

Figure S11. <sup>13</sup>C NMR spectrum of **1S amine** (as the HCl ammonium salt)

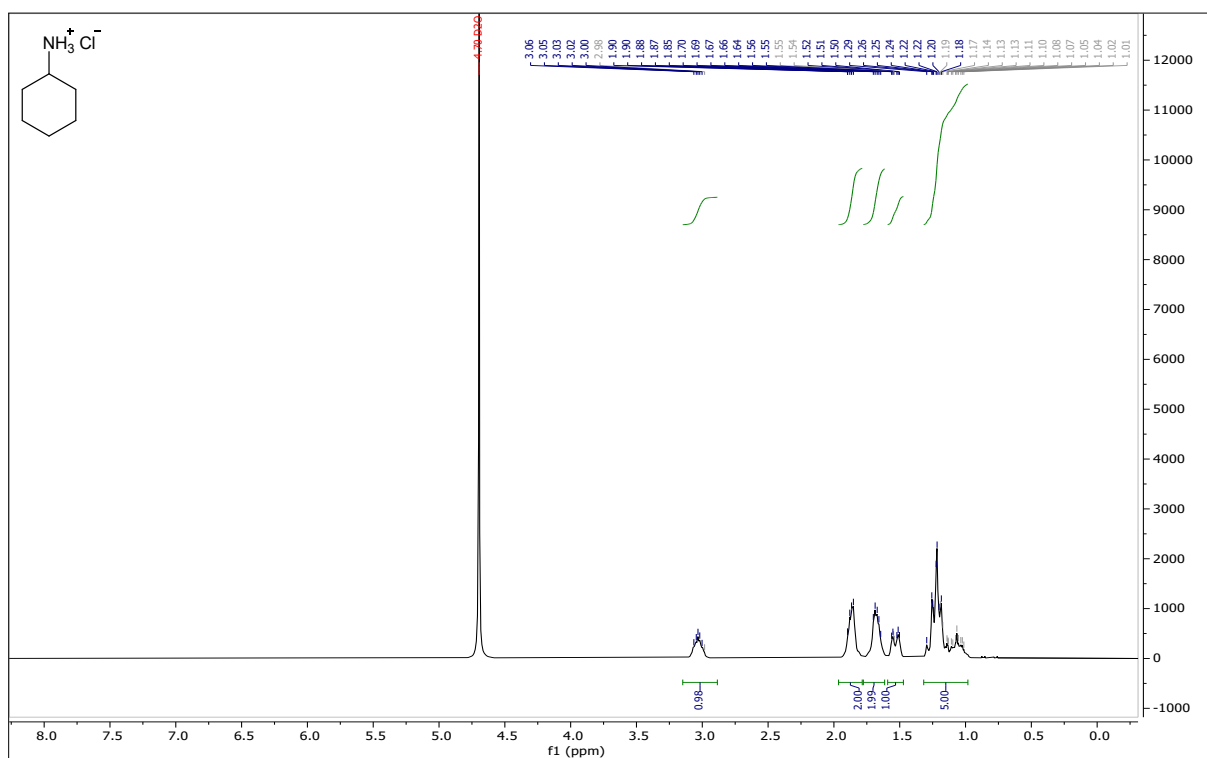

Figure S12. <sup>1</sup>H NMR spectrum of **1a** (as the HCl ammonium salt)

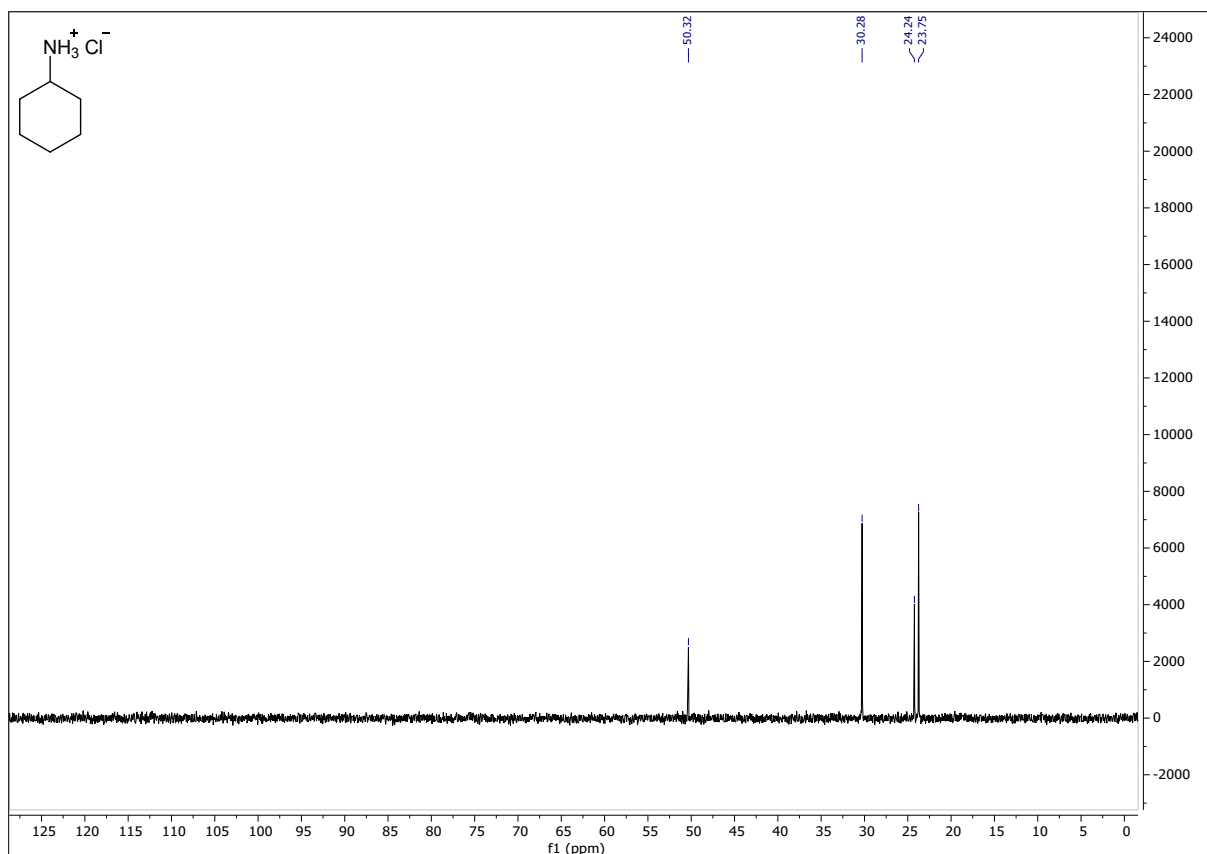

Figure S13.  $^{13}\text{C}$  NMR spectrum of **1a** (as the HCl ammonium salt)

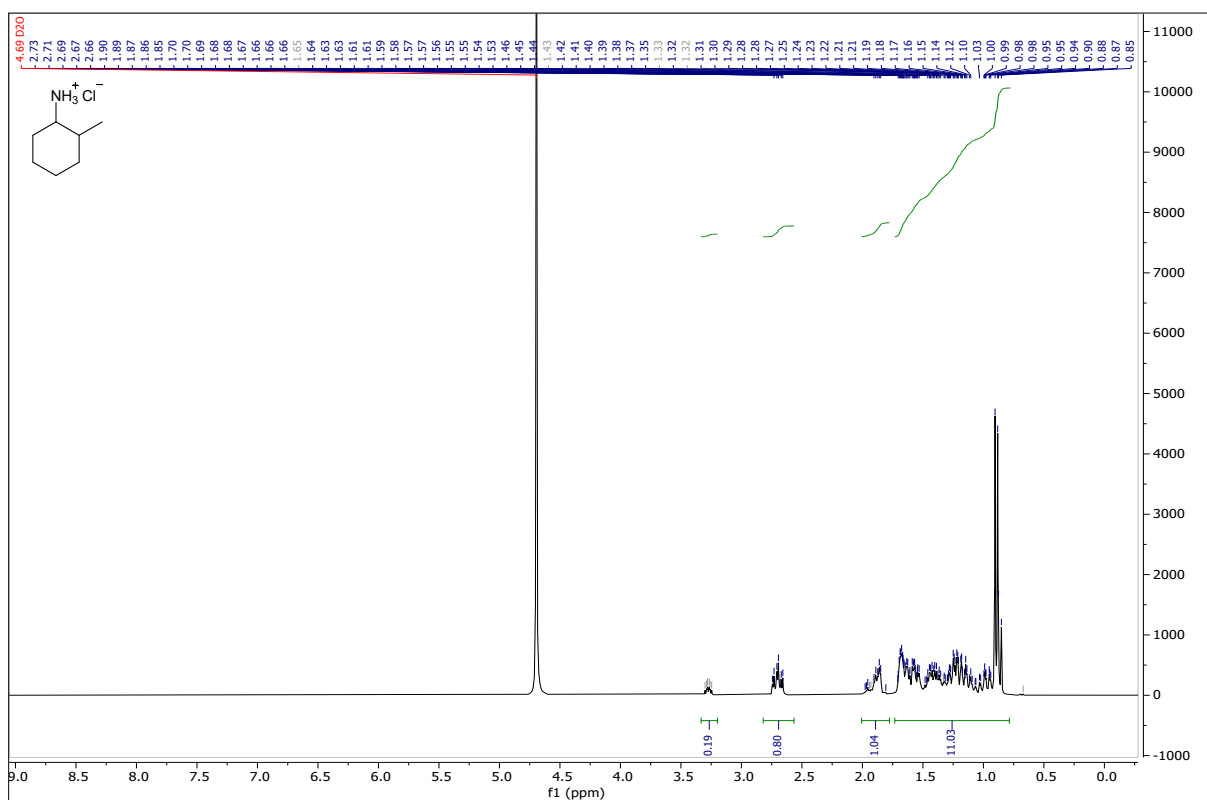

Figure S14.  $^1\text{H}$  NMR spectrum of **2a** (as the HCl ammonium salt)

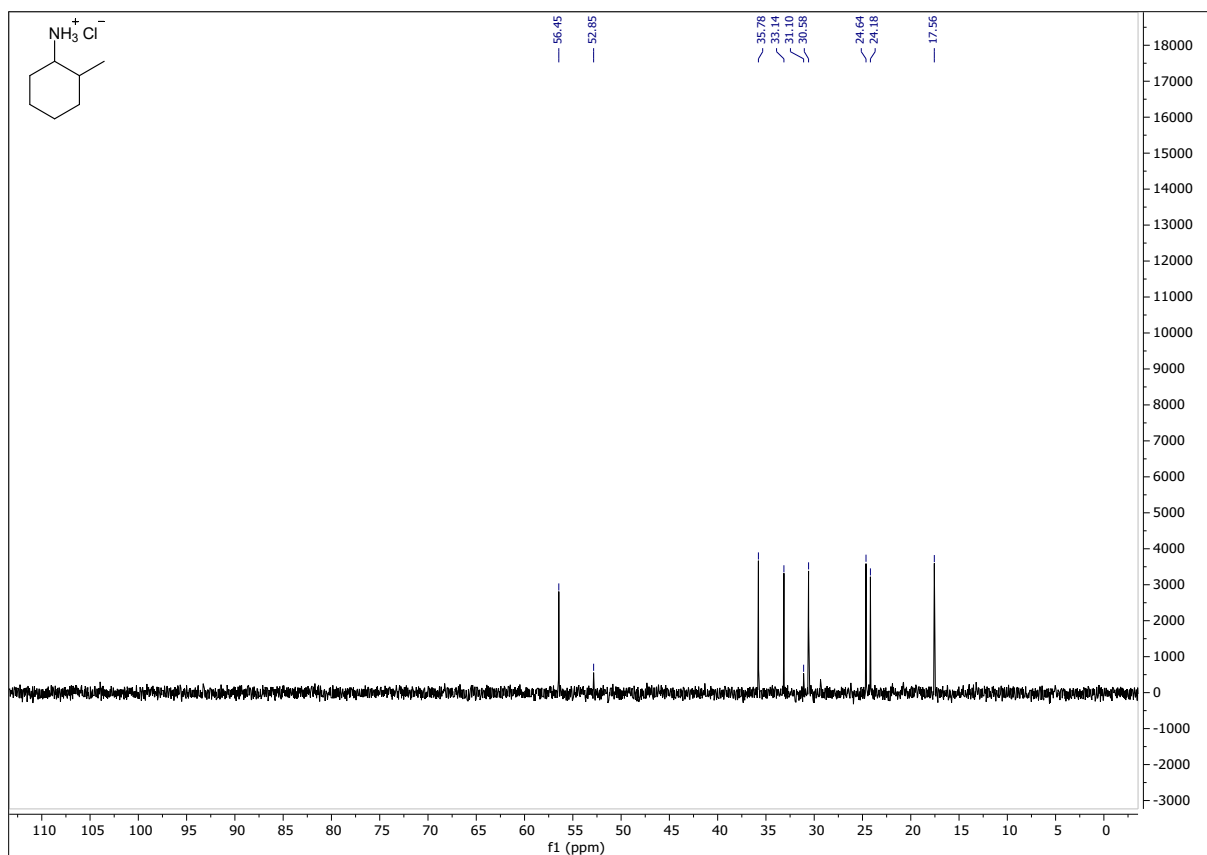

Figure S15. <sup>13</sup>C NMR spectrum of **2a** (as the HCl ammonium salt)

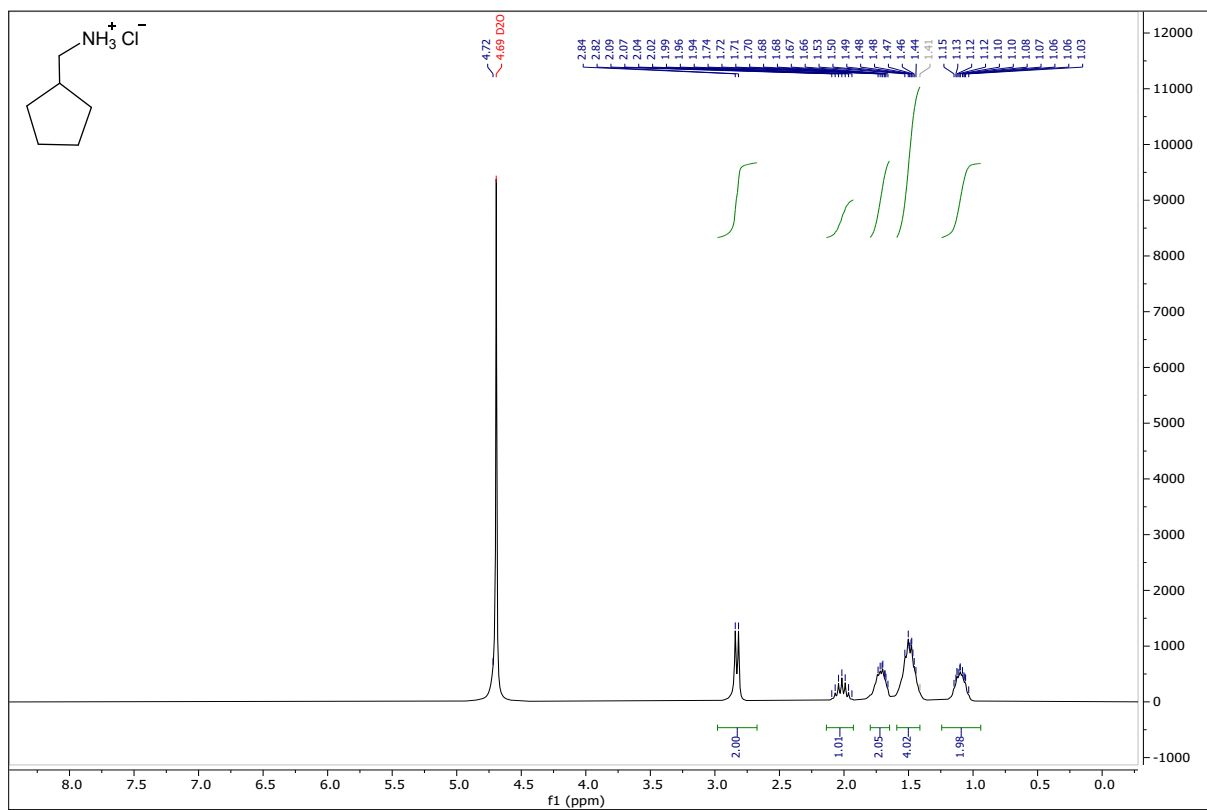

Figure S16. <sup>1</sup>H NMR spectrum of **3a** (as the HCl ammonium salt)

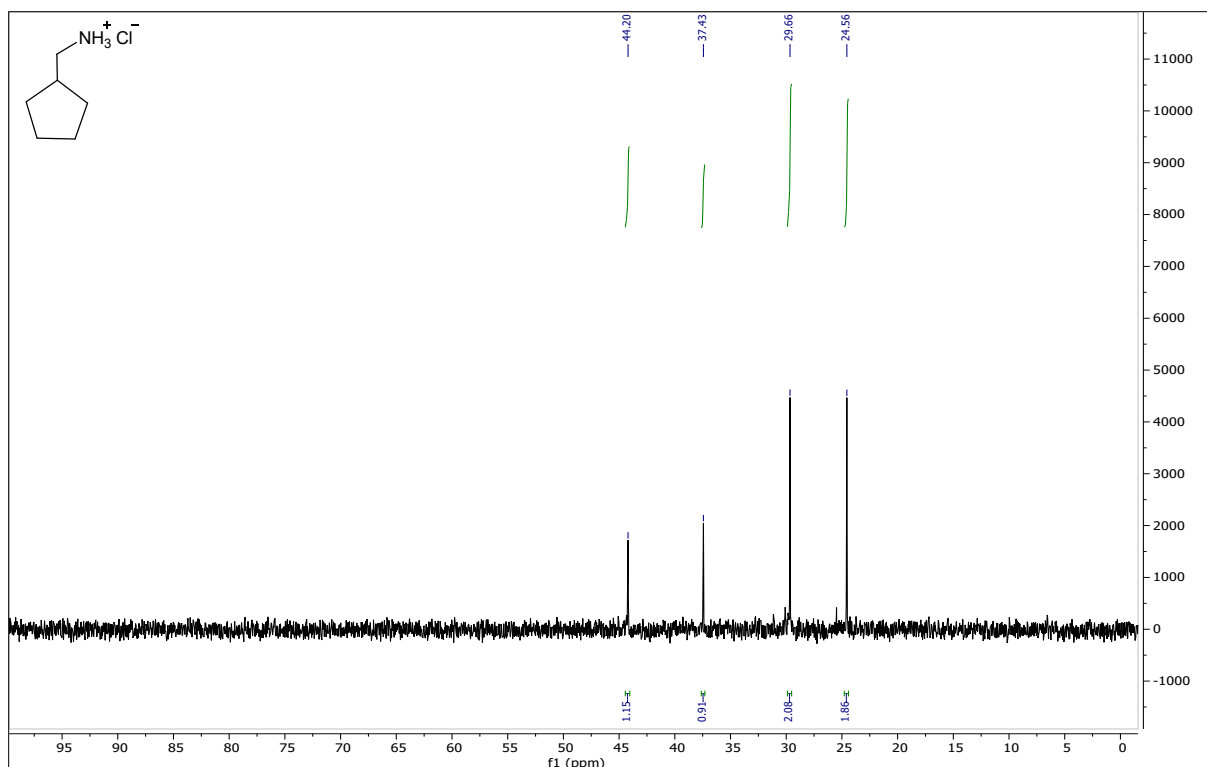

Figure S17. <sup>13</sup>C NMR spectrum of **3a** (as the HCl ammonium salt)

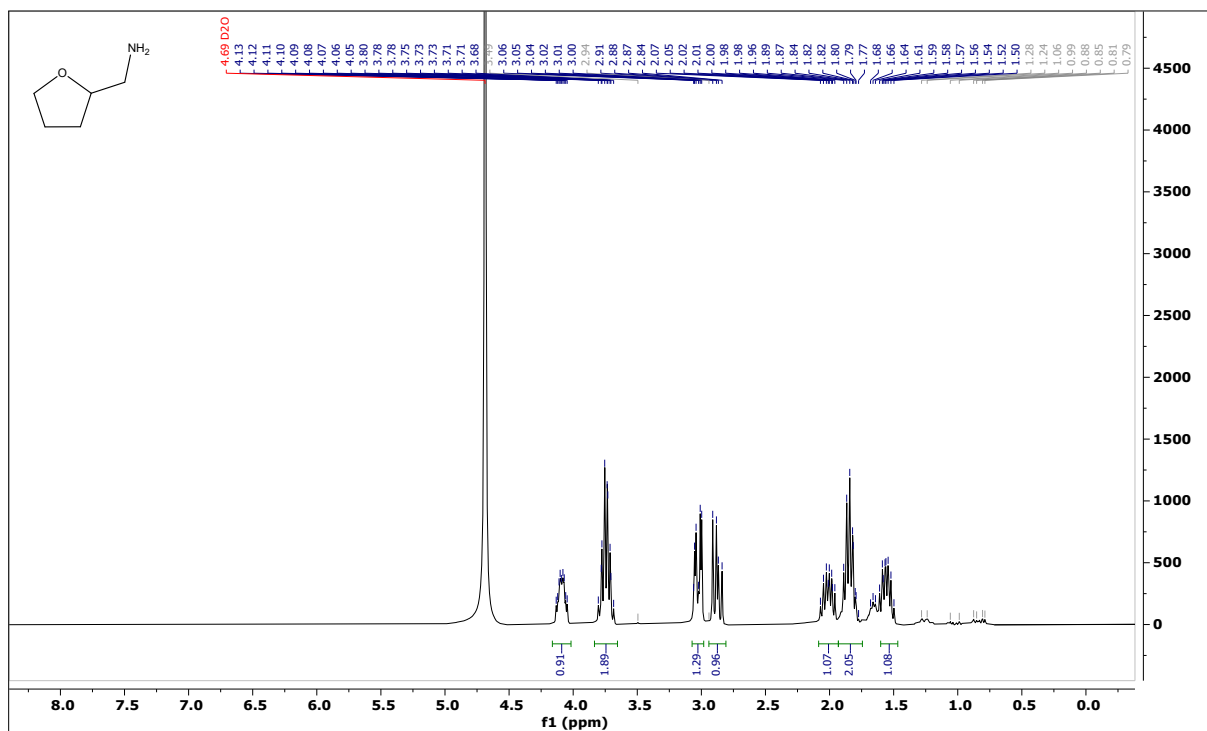

Figure S18. <sup>1</sup>H NMR spectrum of **4a**

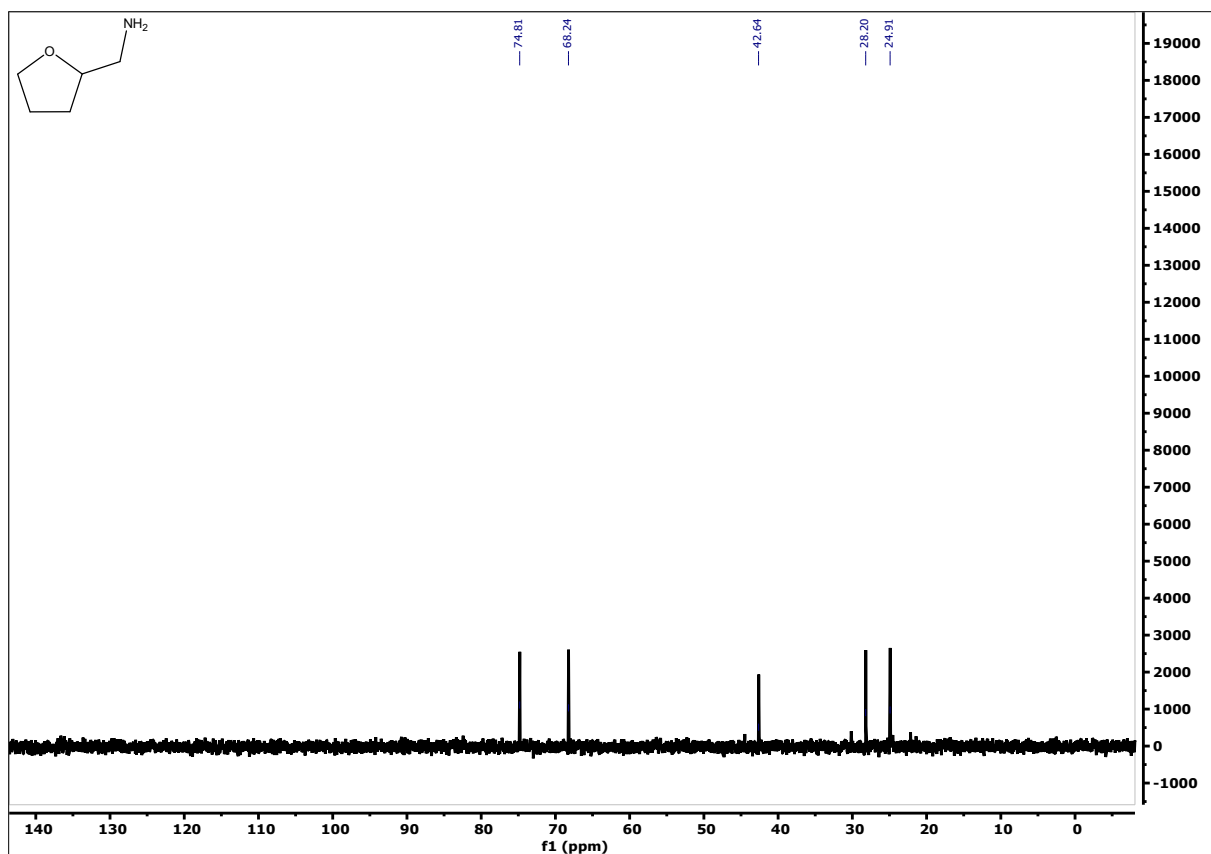

Figure S19.  $^{13}\text{C}$  NMR spectrum of 4a

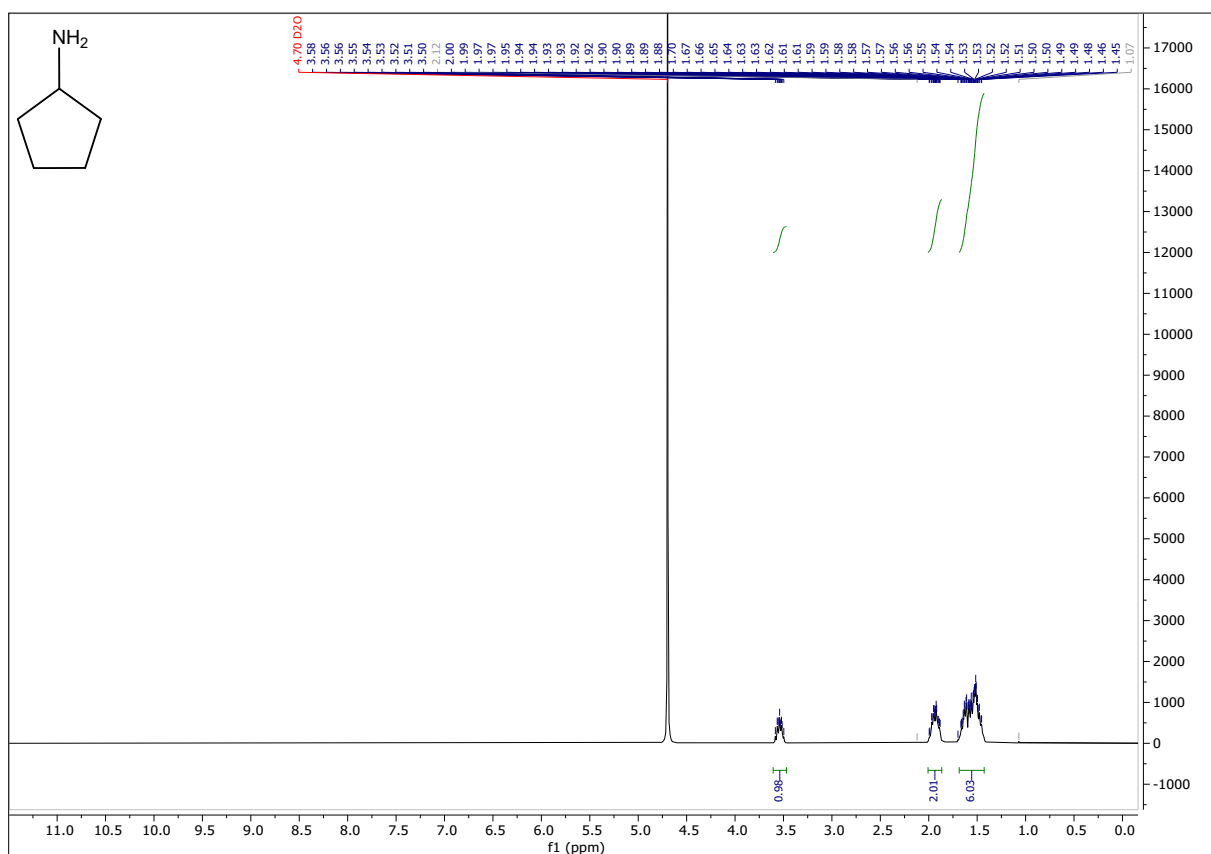

Figure S20. <sup>1</sup>H NMR spectrum of 5a

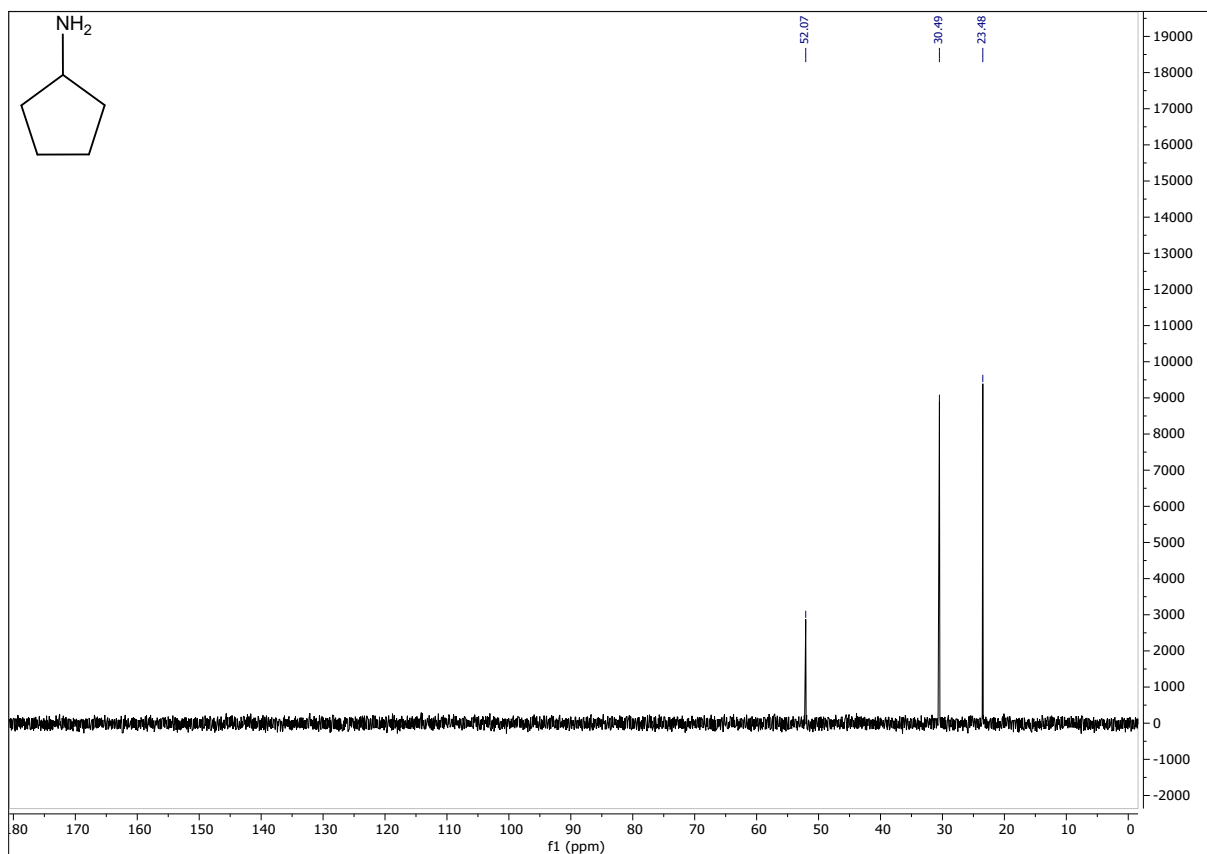

Figure S21. <sup>13</sup>C NMR spectrum of 5a

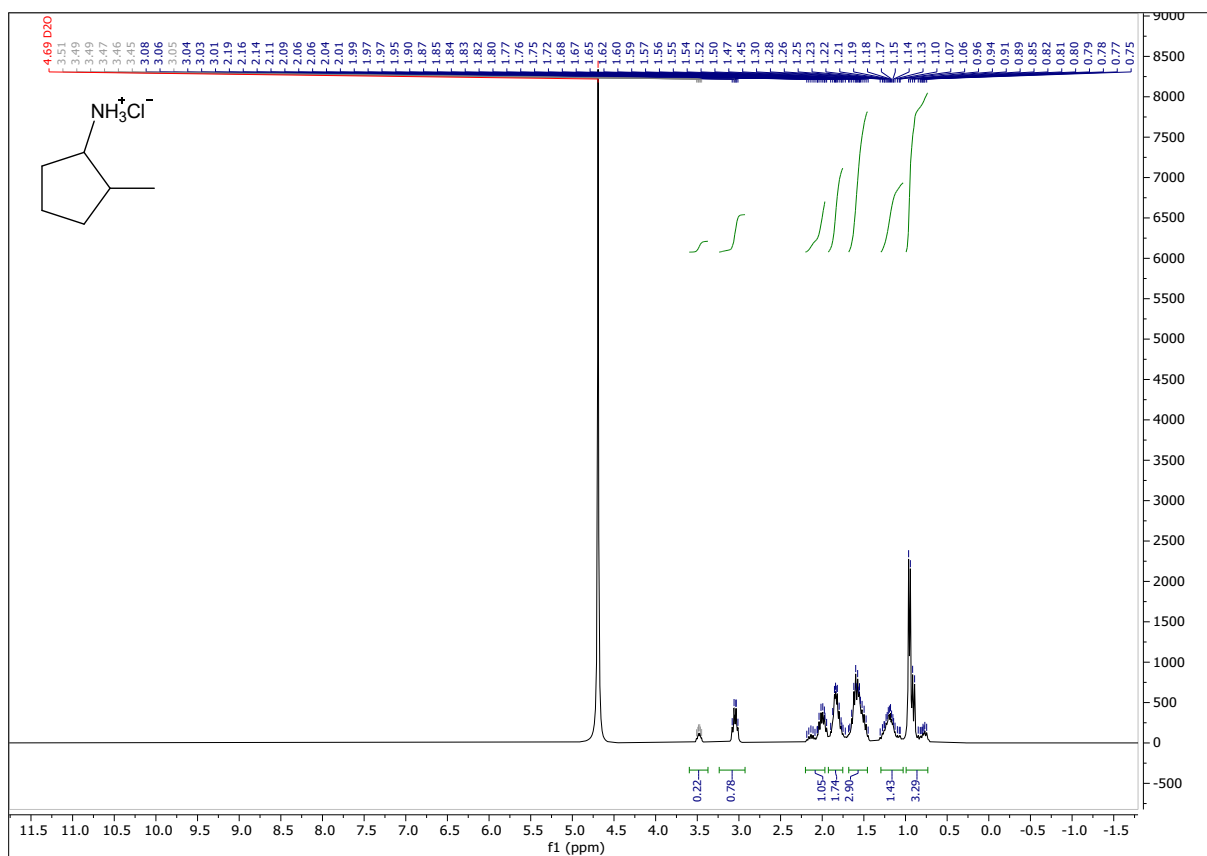



Figure S22. <sup>1</sup>H NMR spectrum of **6a** (as the HCl ammonium salt)

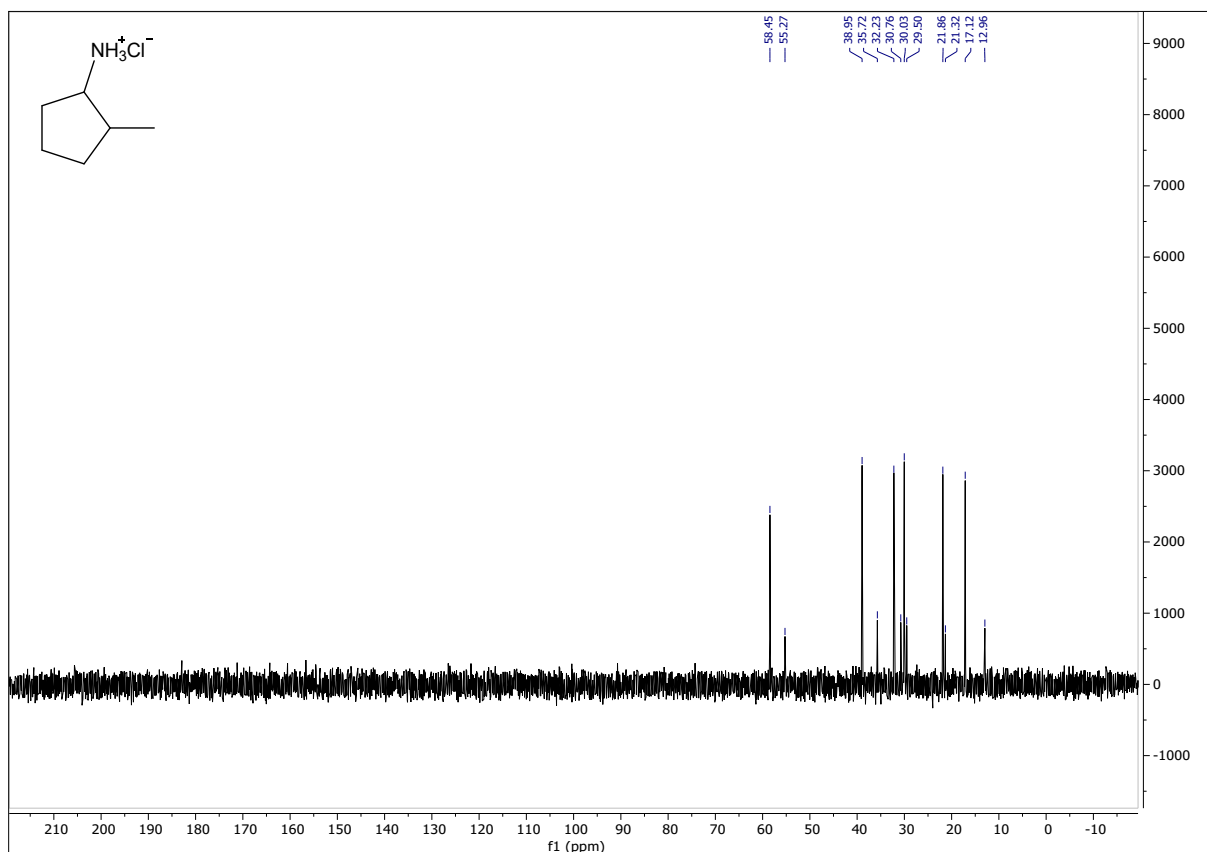

Figure S23. <sup>13</sup>C NMR spectrum of **6a** (as the HCl ammonium salt)

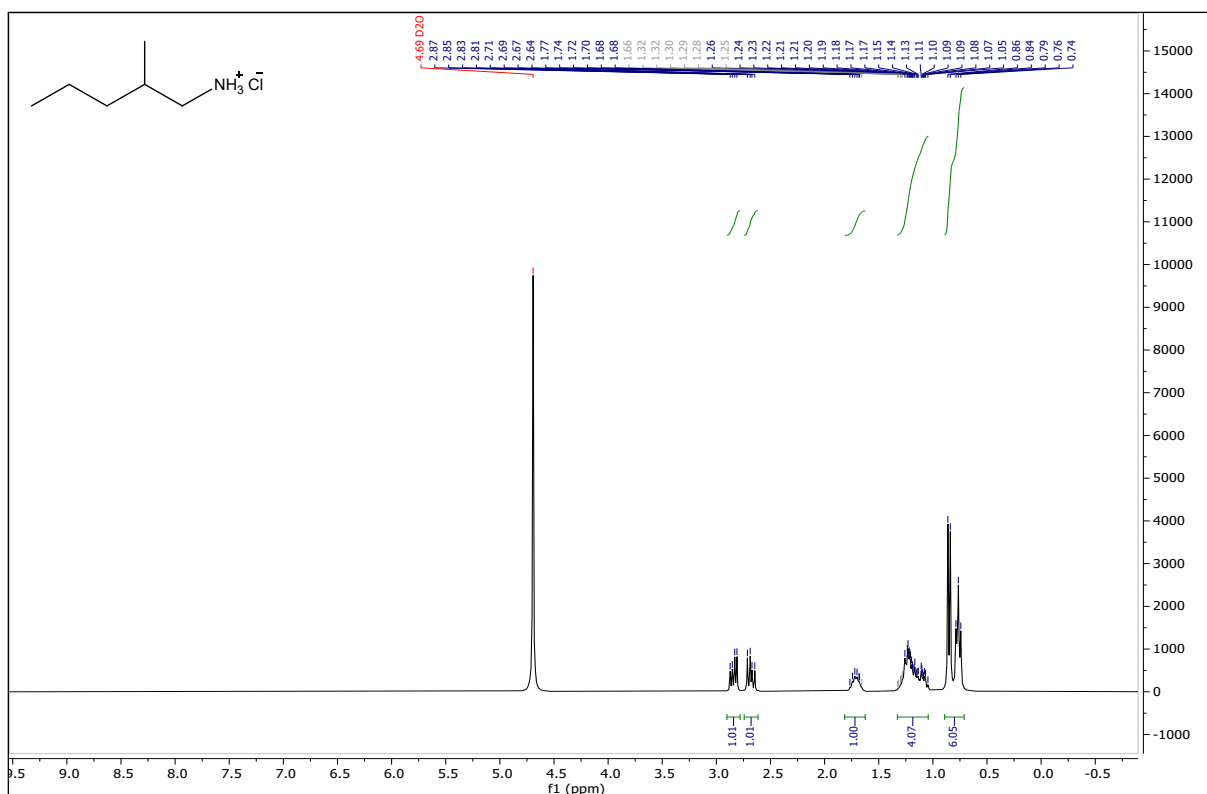

Figure S24. <sup>1</sup>H-NMR spectrum of **7a** (as the HCl ammonium salt)

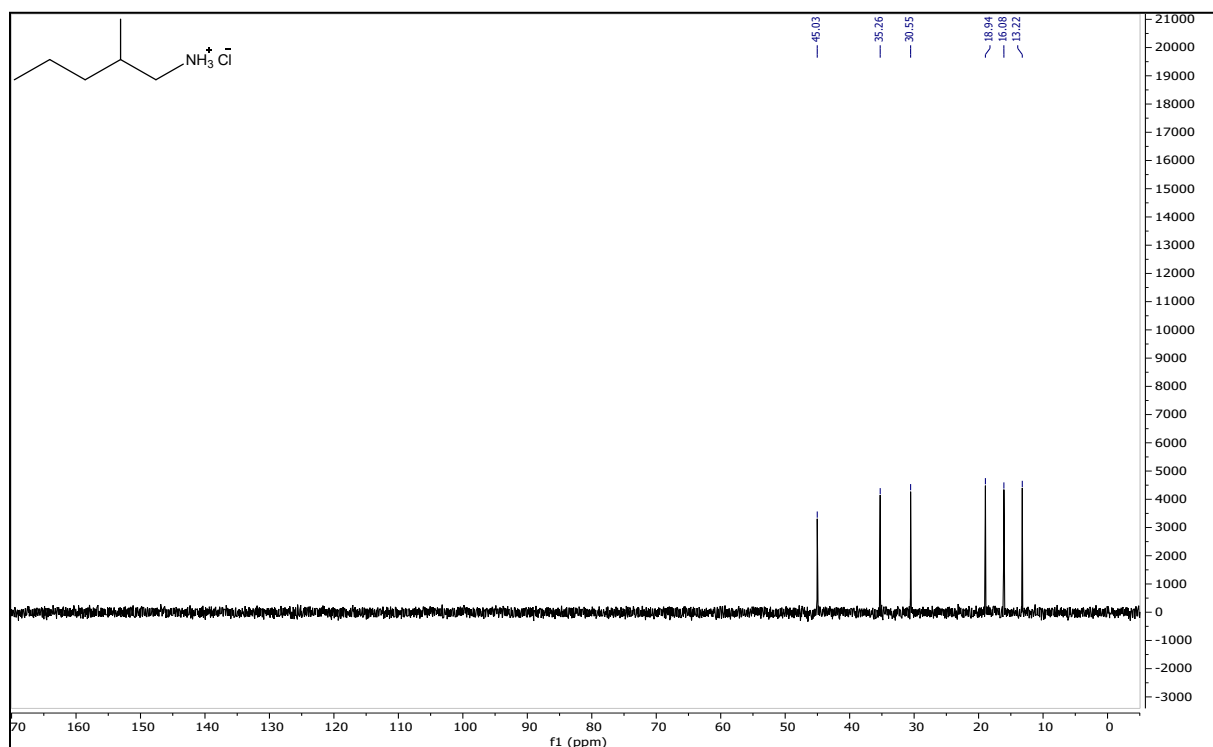

Figure S25.  $^{13}\text{C}$  NMR spectrum of **7a** (as the HCl ammonium salt)

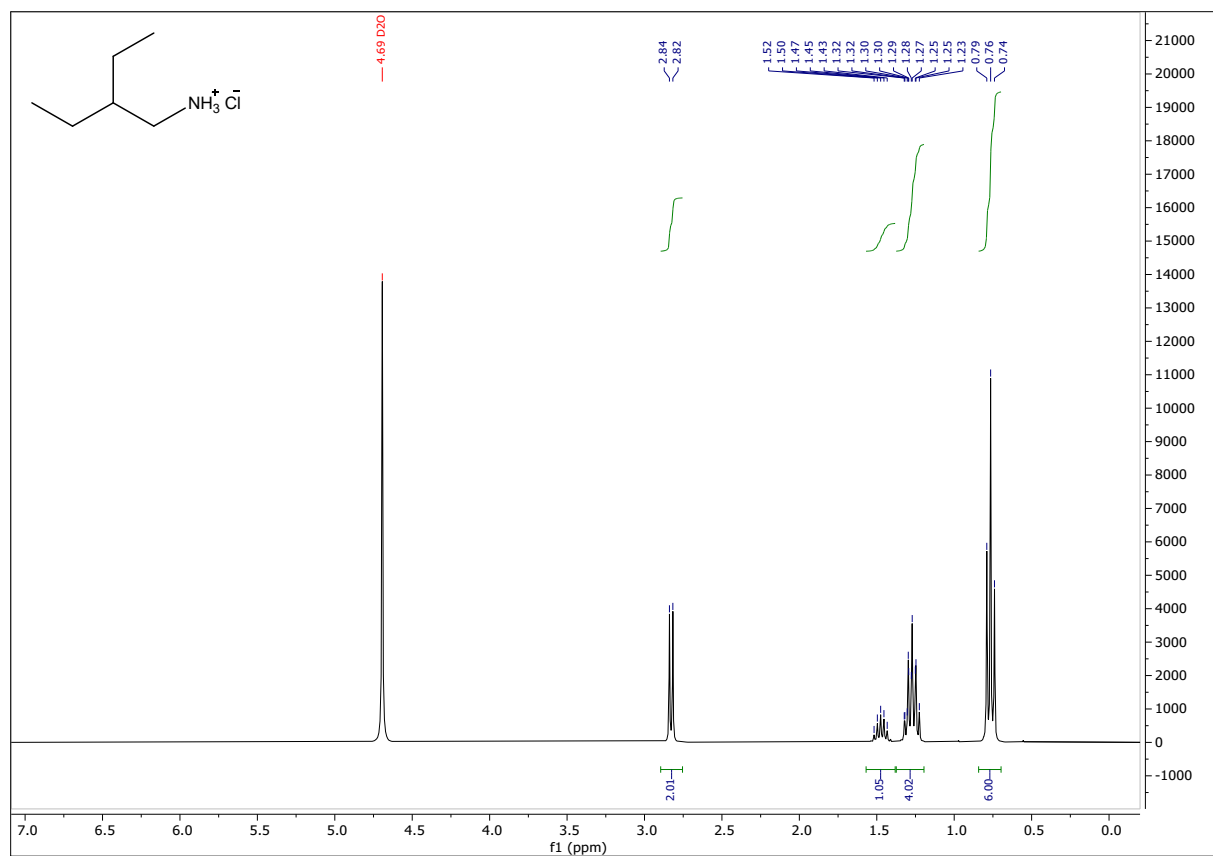

Figure S26.  $^1\text{H}$  NMR spectrum of **8a** (as the HCl ammonium salt)

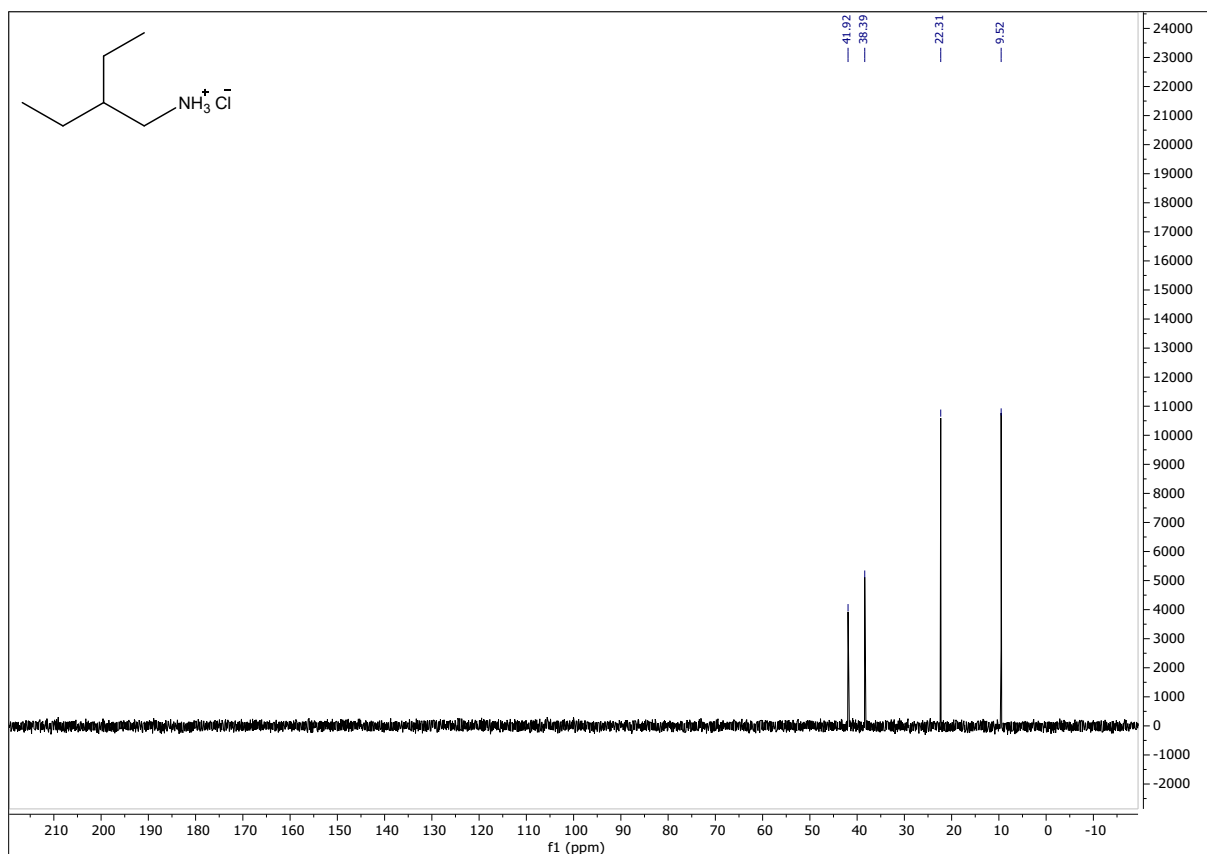

Figure S27.  $^{13}\text{C}$  NMR spectrum of **8a** (as the HCl ammonium salt)

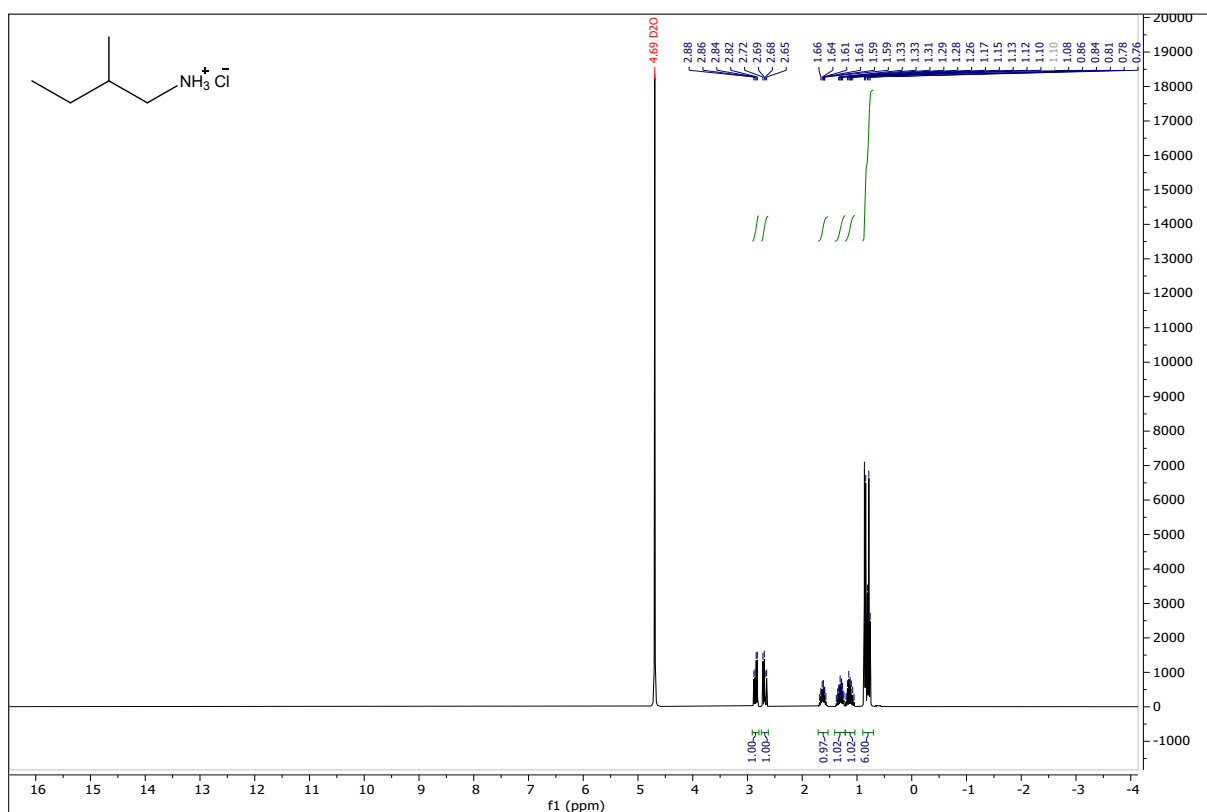

Figure S28.  $^1\text{H}$  NMR spectrum of **9a** (as the HCl ammonium salt)

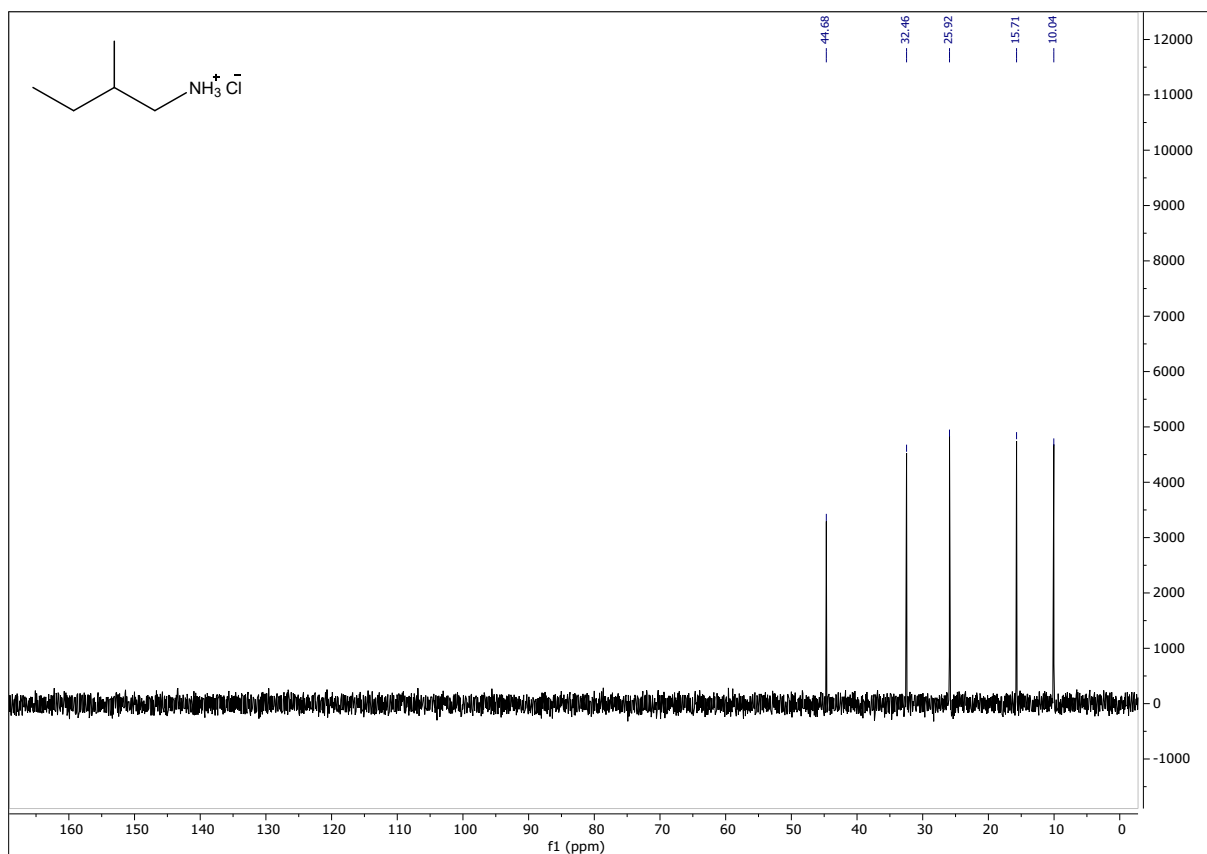

Figure S29. <sup>13</sup>C NMR spectrum of **9a** (as the HCl ammonium salt)

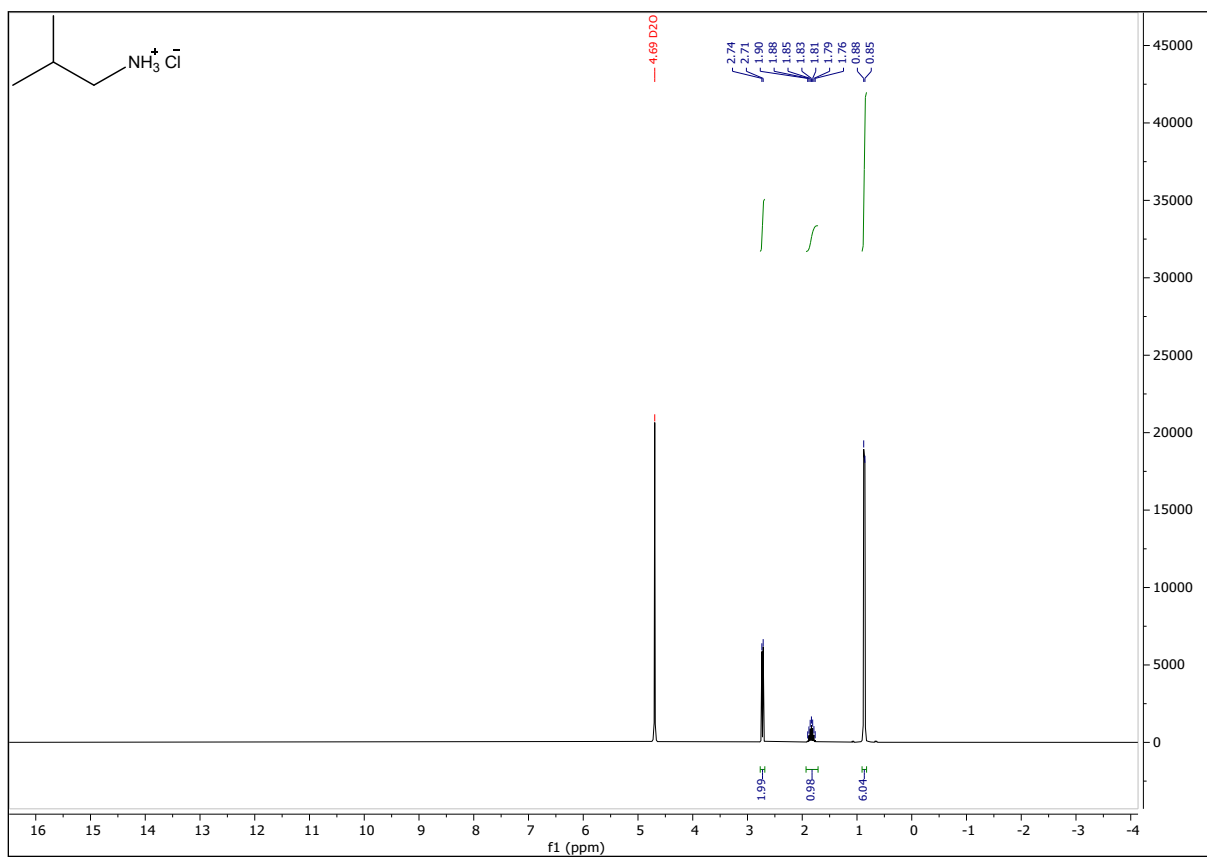

Figure S30. <sup>1</sup>H NMR spectrum of **10a** (as the HCl ammonium salt)

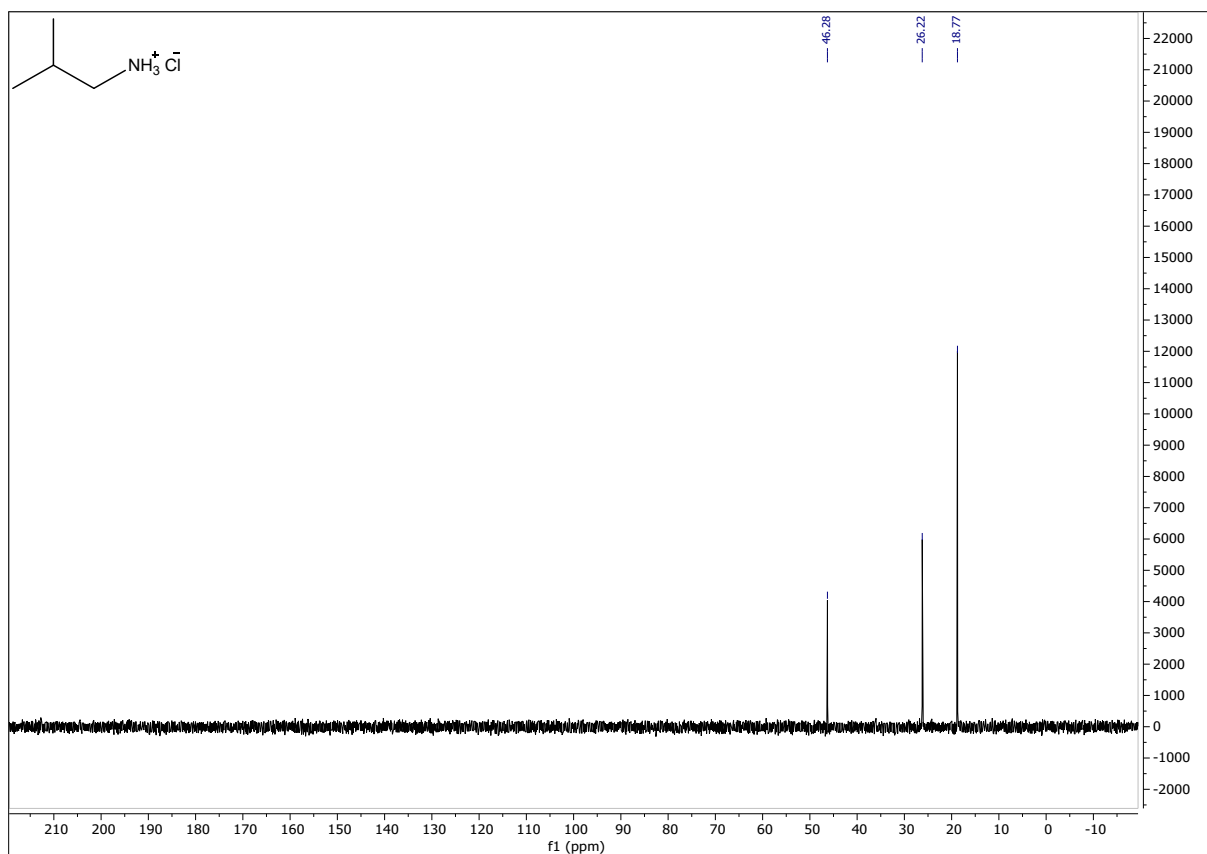

Figure S31.  $^{13}\text{C}$  NMR spectrum of **10a** (as the HCl ammonium salt)

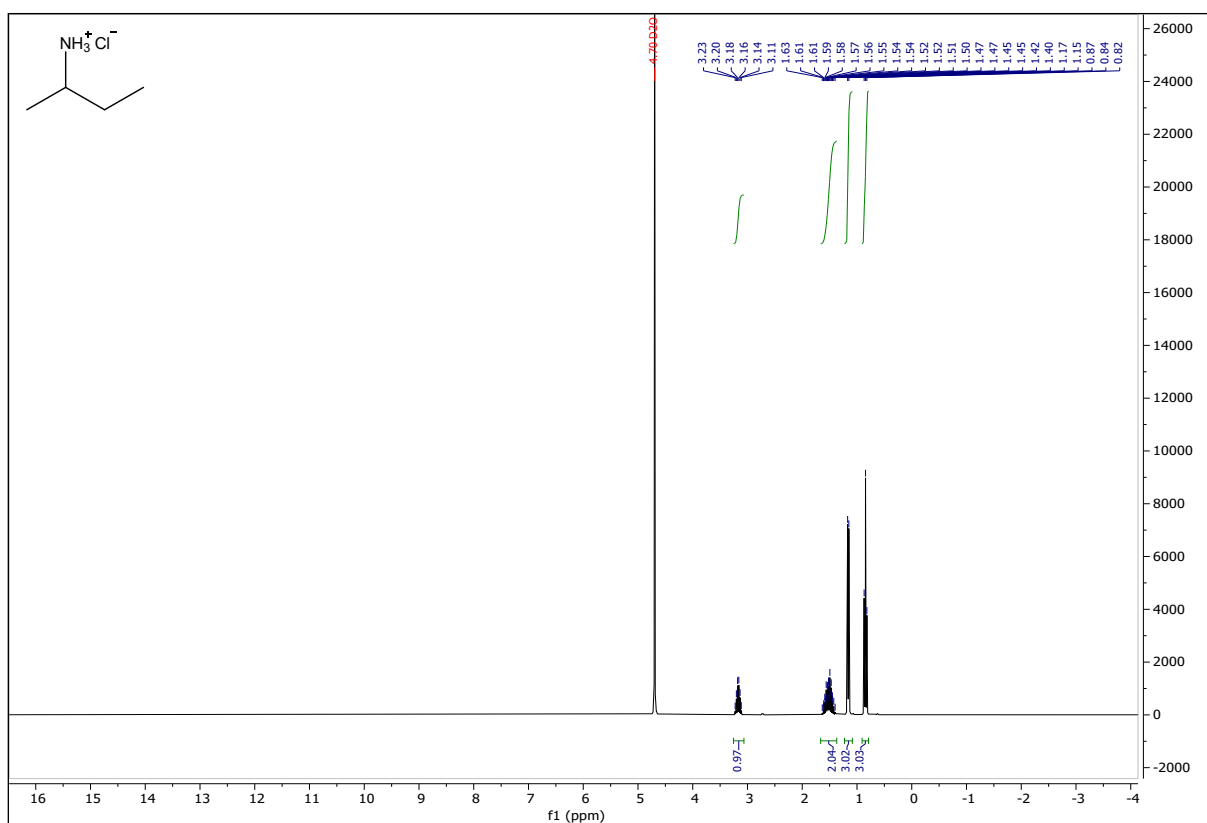

Figure S32.  $^1\text{H}$  NMR spectrum of **11a** (as the HCl ammonium salt)

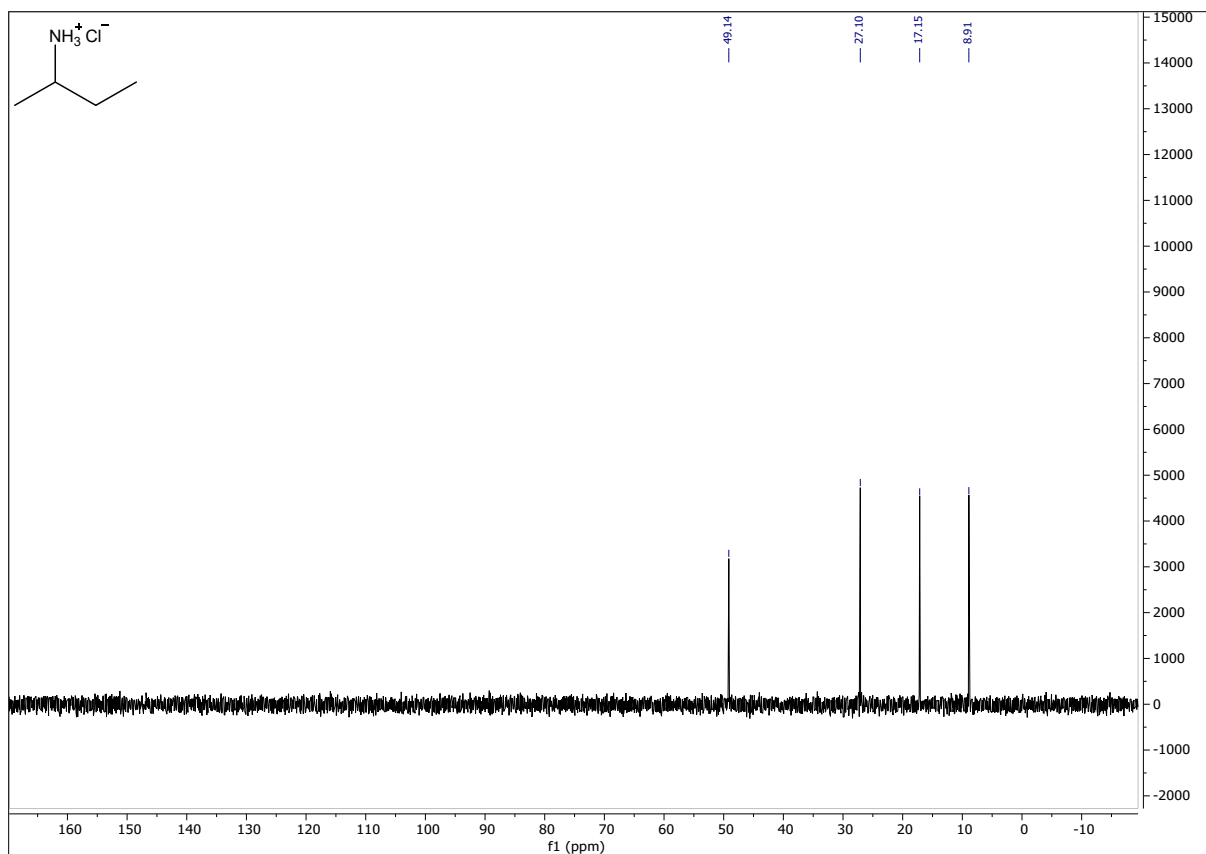

Figure S33.  $^{13}\text{C}$  NMR spectrum of 11a (as the HCl ammonium salt)

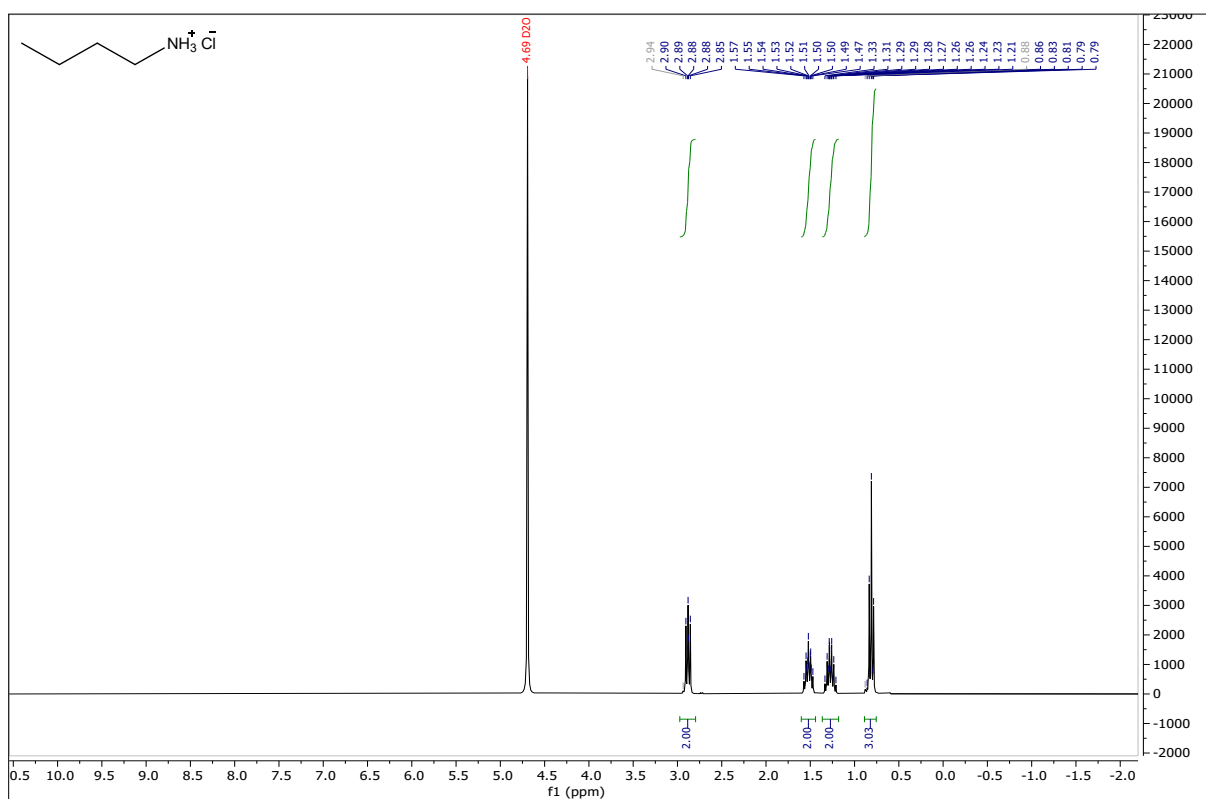

Figure S34.  $^1\text{H}$  NMR spectrum of 12a (as the HCl ammonium salt)

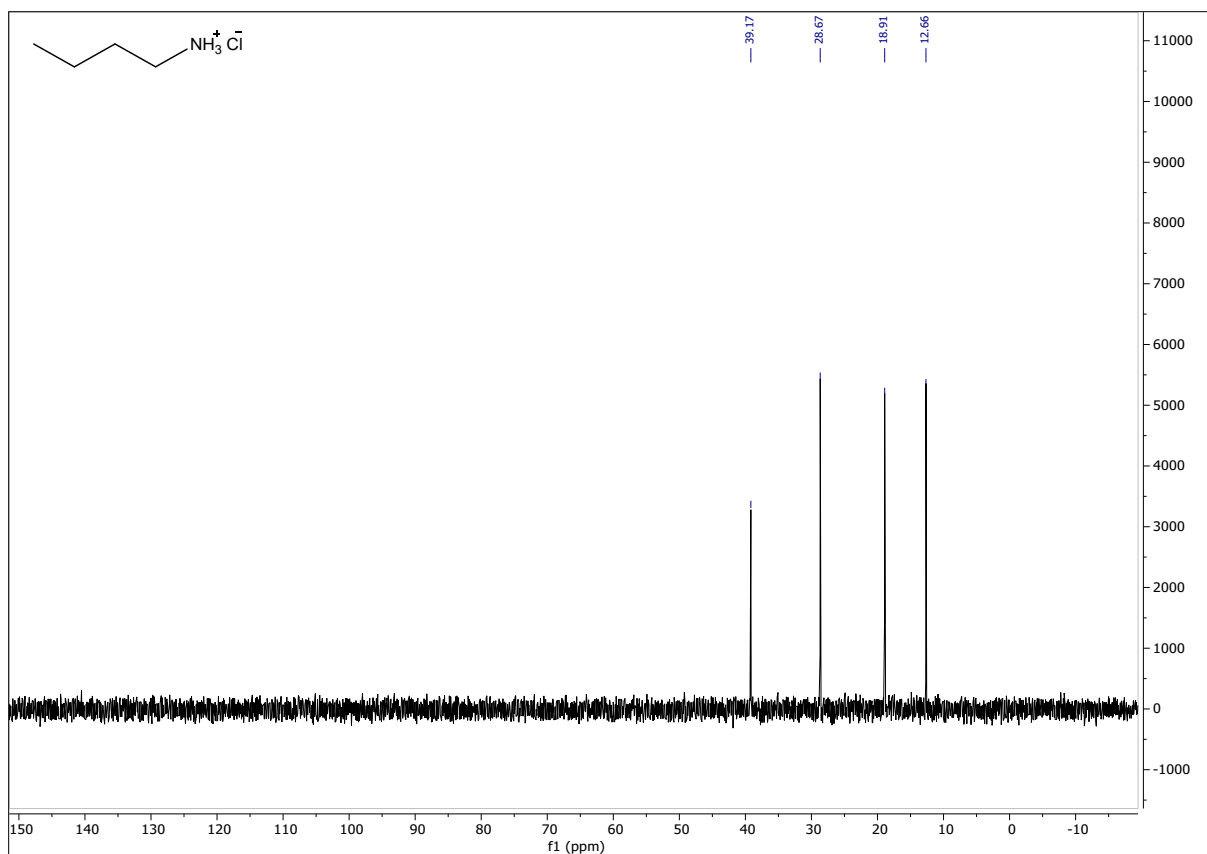

Figure S35.  $^{13}\text{C}$  NMR spectrum of **12a** (as the HCl ammonium salt)

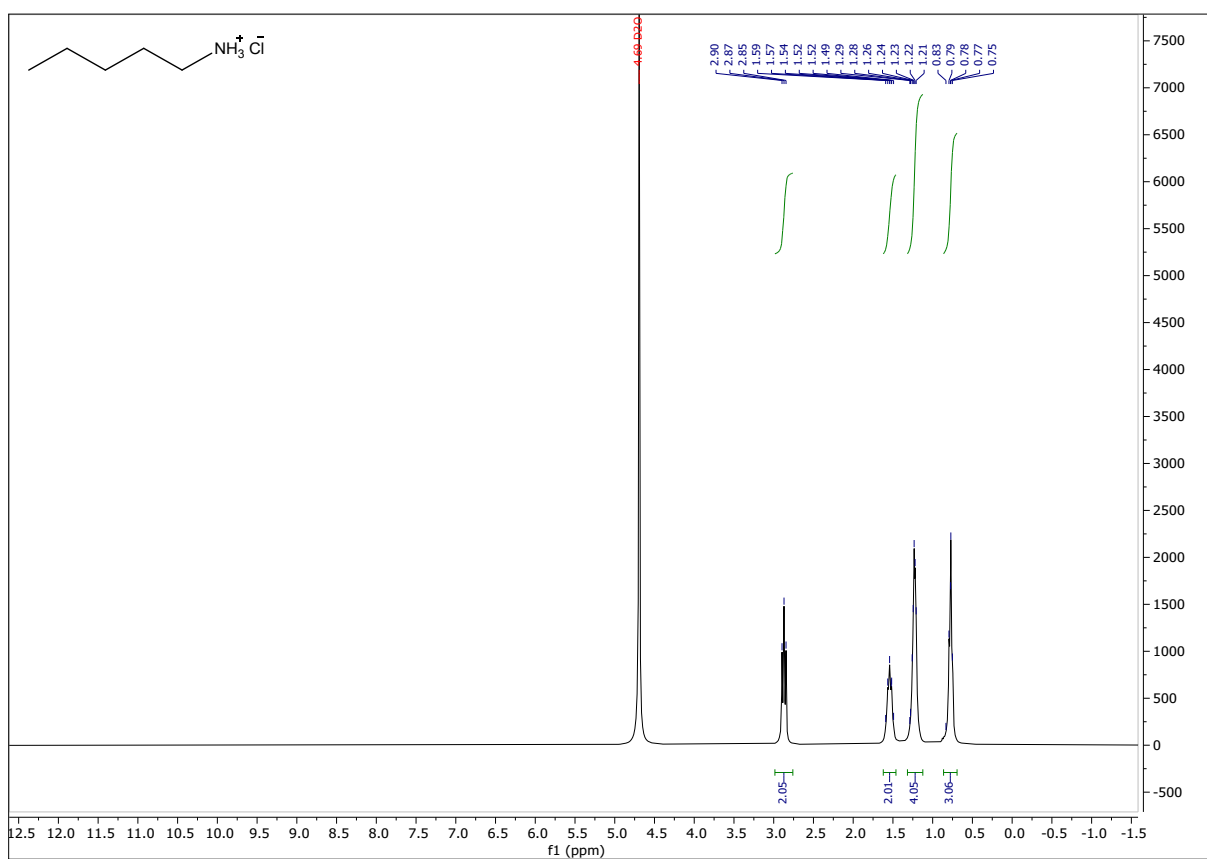

Figure S36.  $^1\text{H}$  NMR spectrum of **13a** (as the HCl ammonium salt)

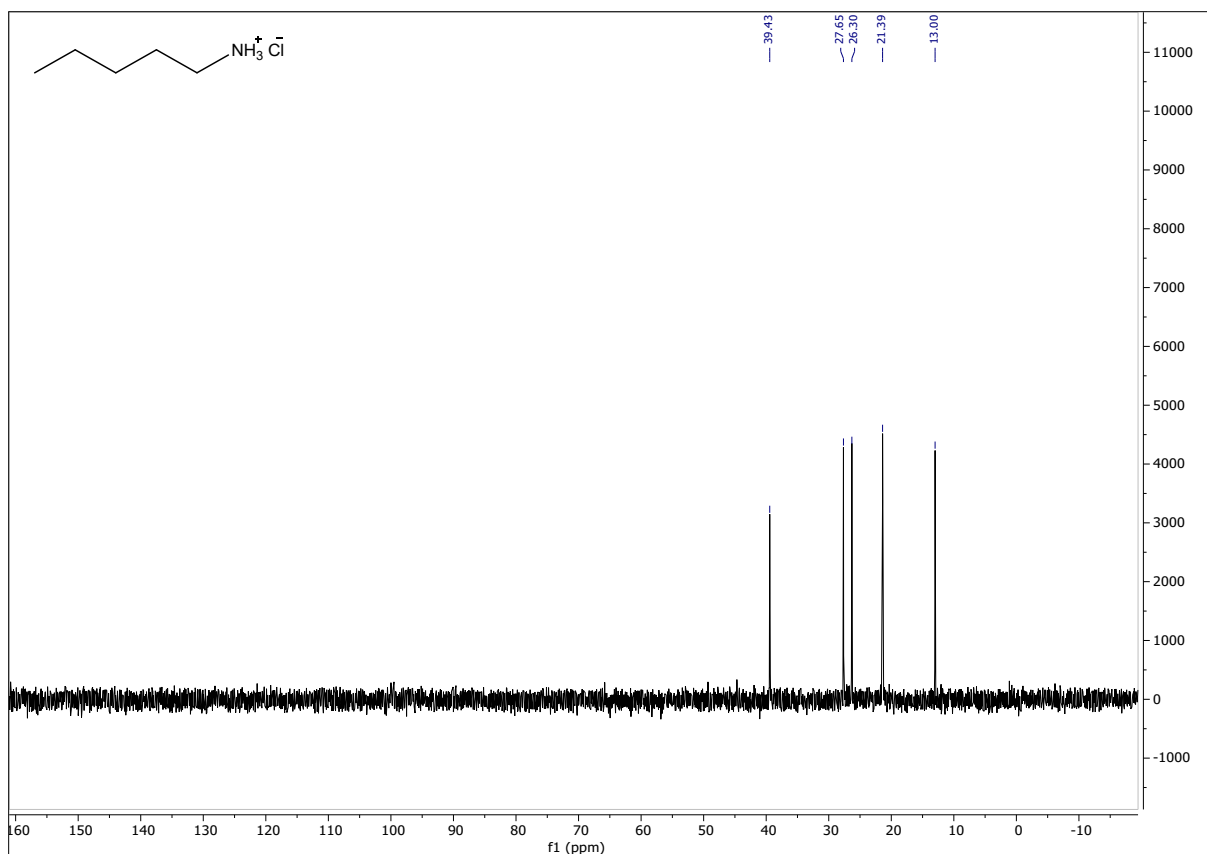

Figure S37.  $^{13}\text{C}$  NMR spectrum of **13a** (as the HCl ammonium salt)

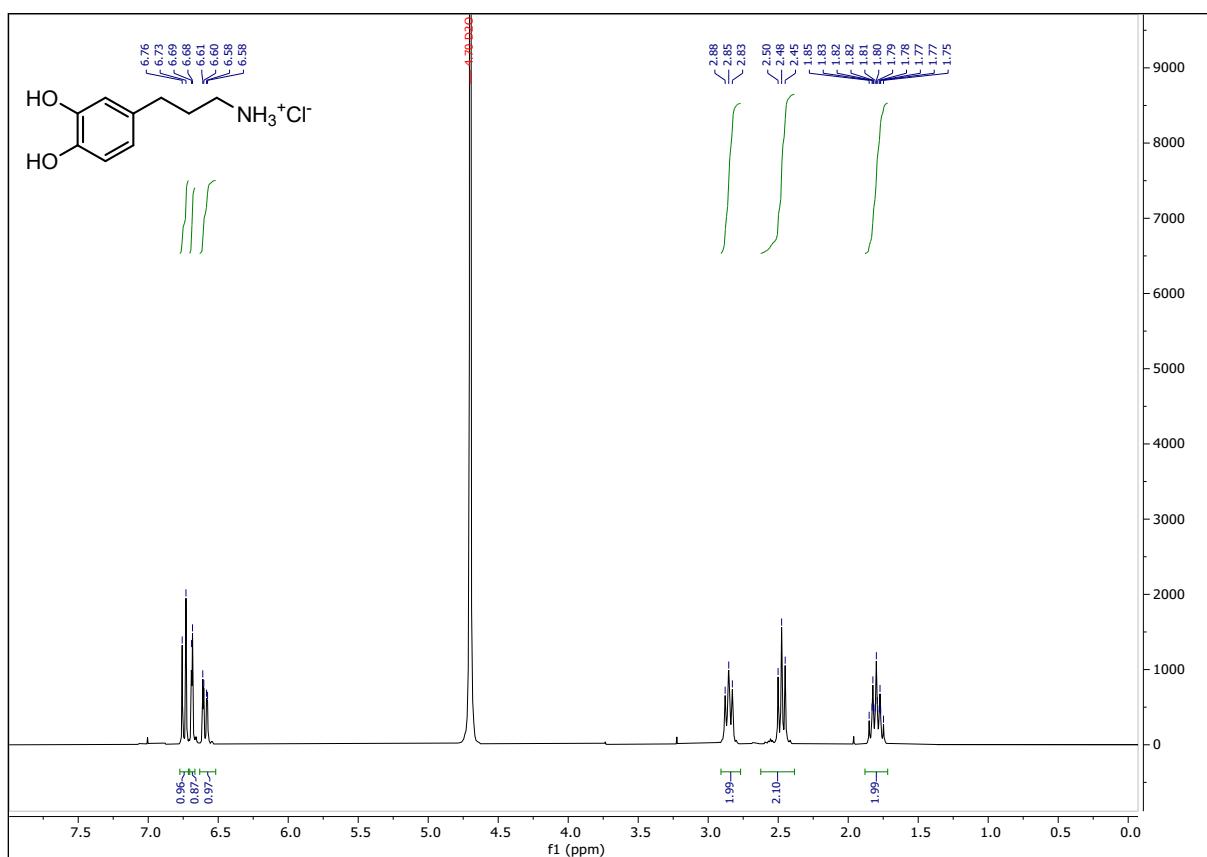

Figure S38.  $^1\text{H}$  NMR spectrum of **1B** (as the HCl ammonium salt)



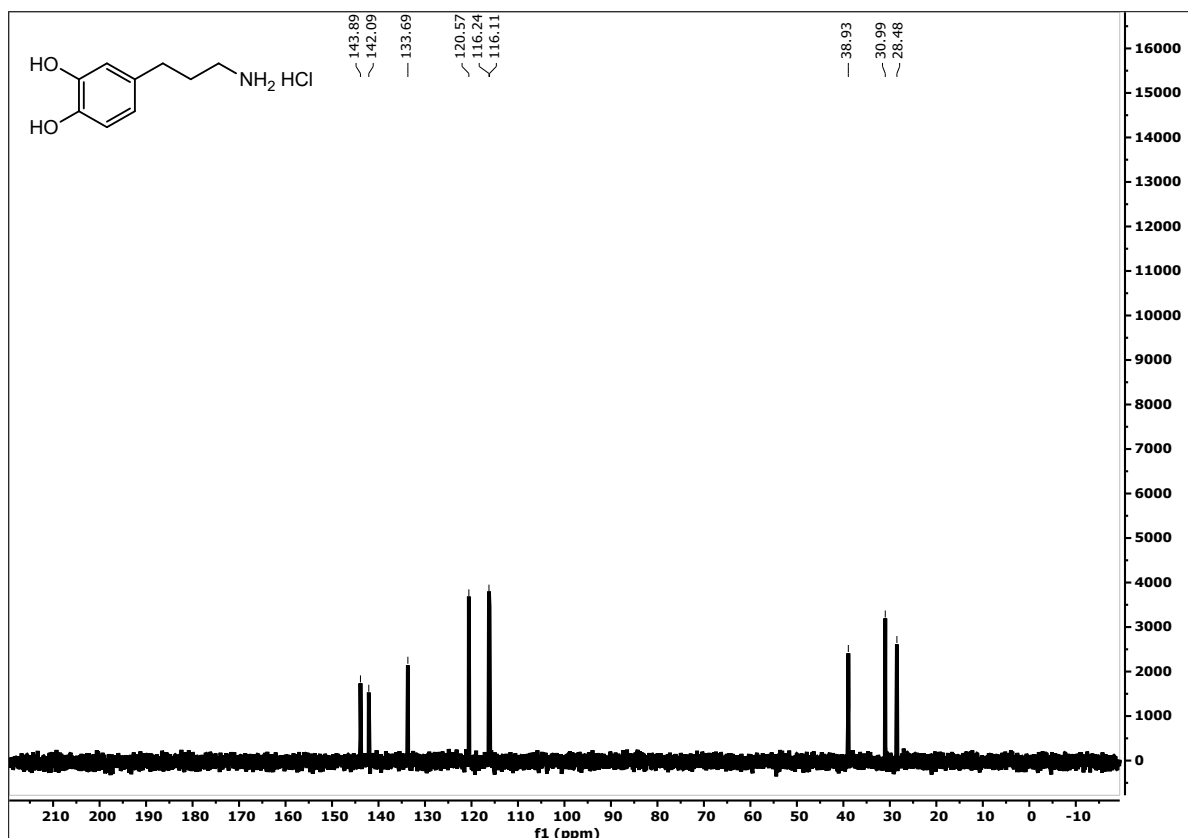

Figure S39. <sup>13</sup>C NMR spectrum of 1B (as the HCl ammonium salt)

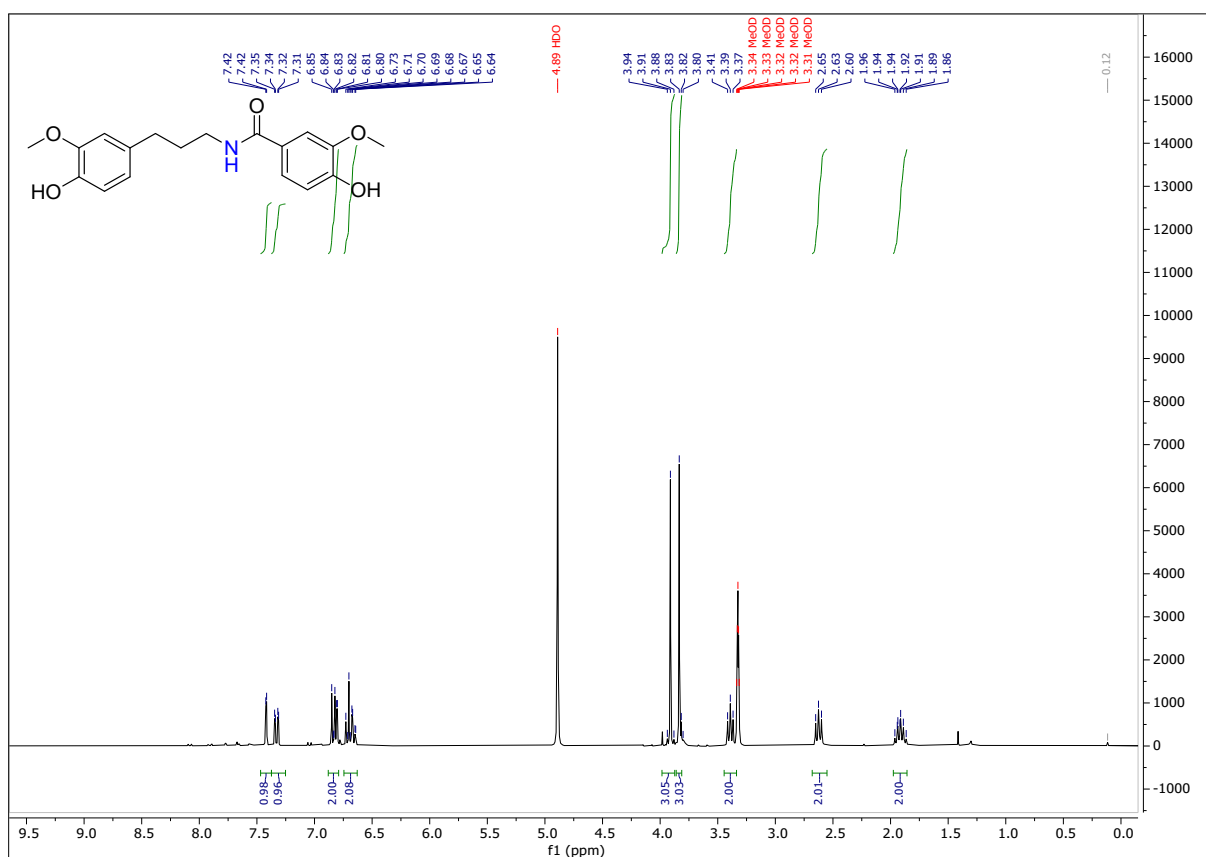

Figure S40. <sup>1</sup>H NMR spectrum of 2B

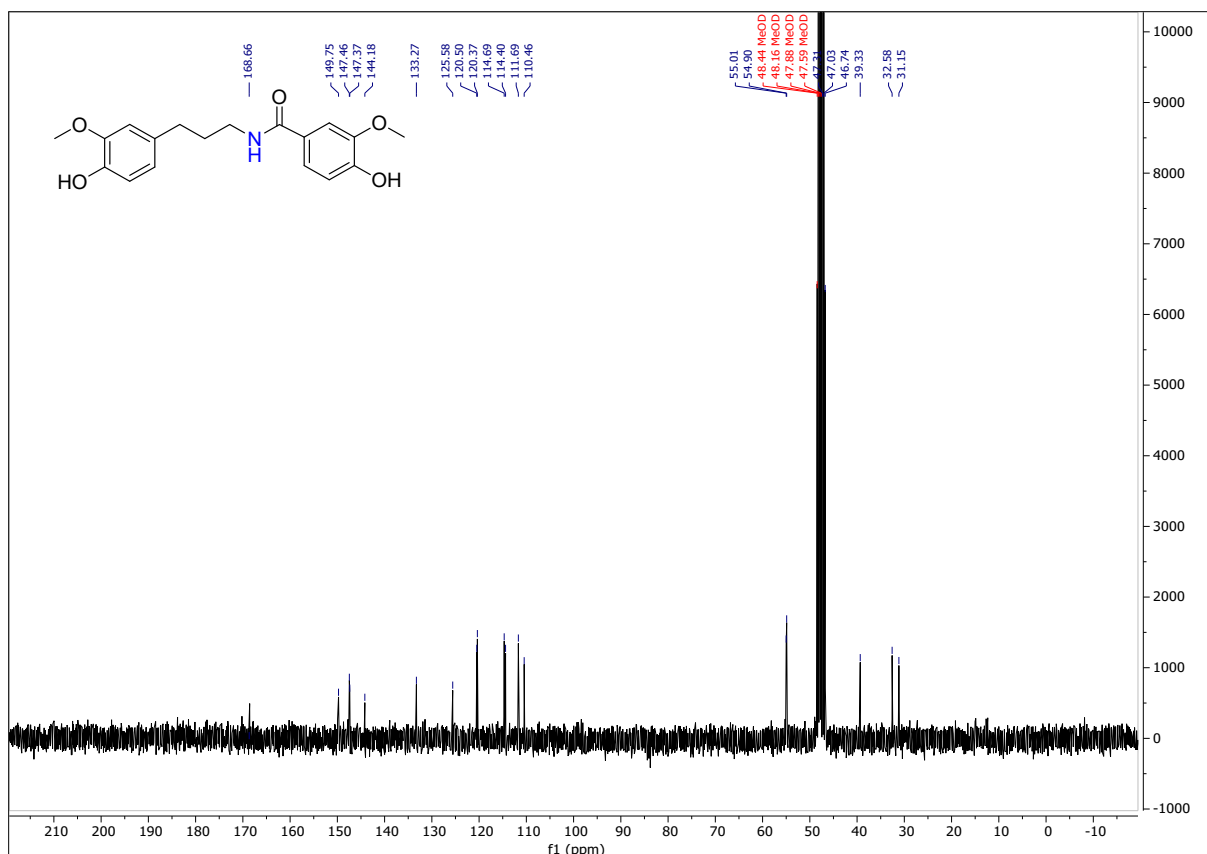

Figure S41. <sup>13</sup>C NMR spectrum of 2B

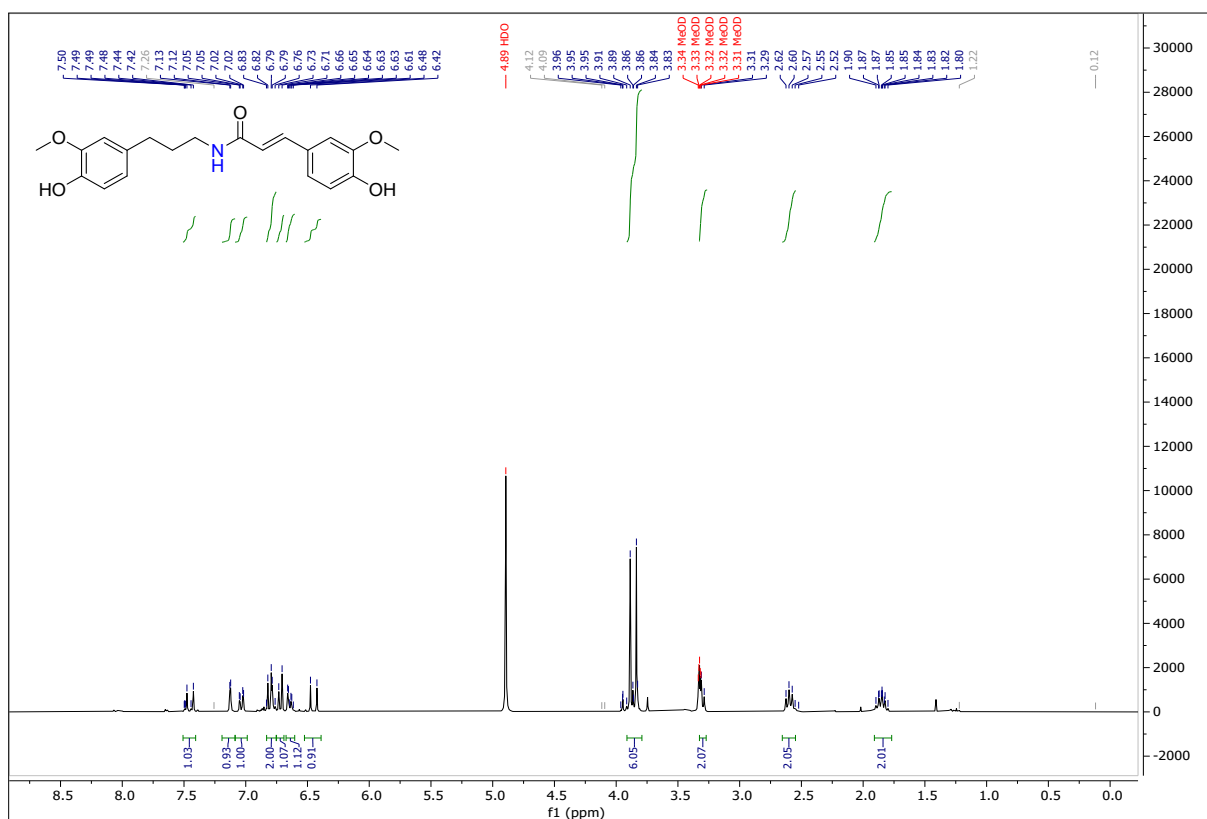

Figure S42. <sup>1</sup>H NMR spectrum of 3B

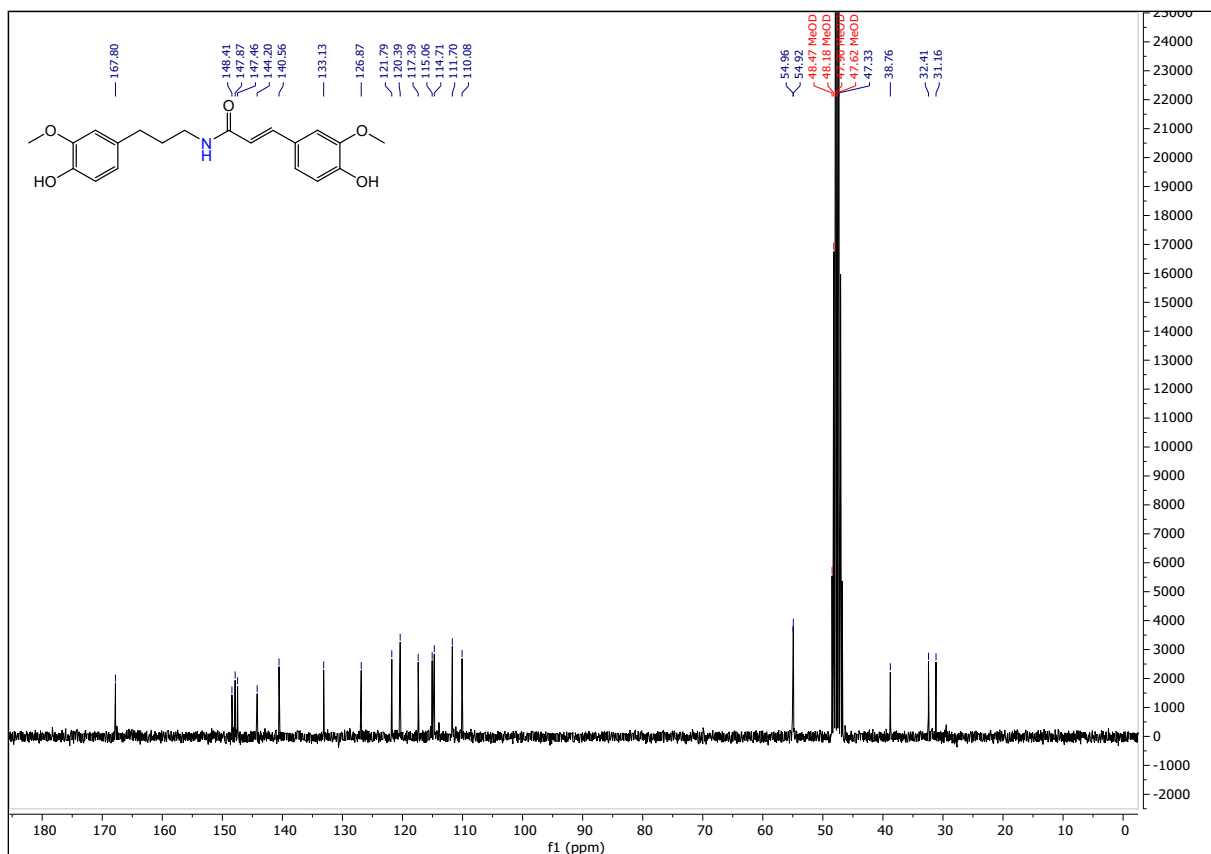

Figure S43. <sup>13</sup>C NMR spectrum of 3B

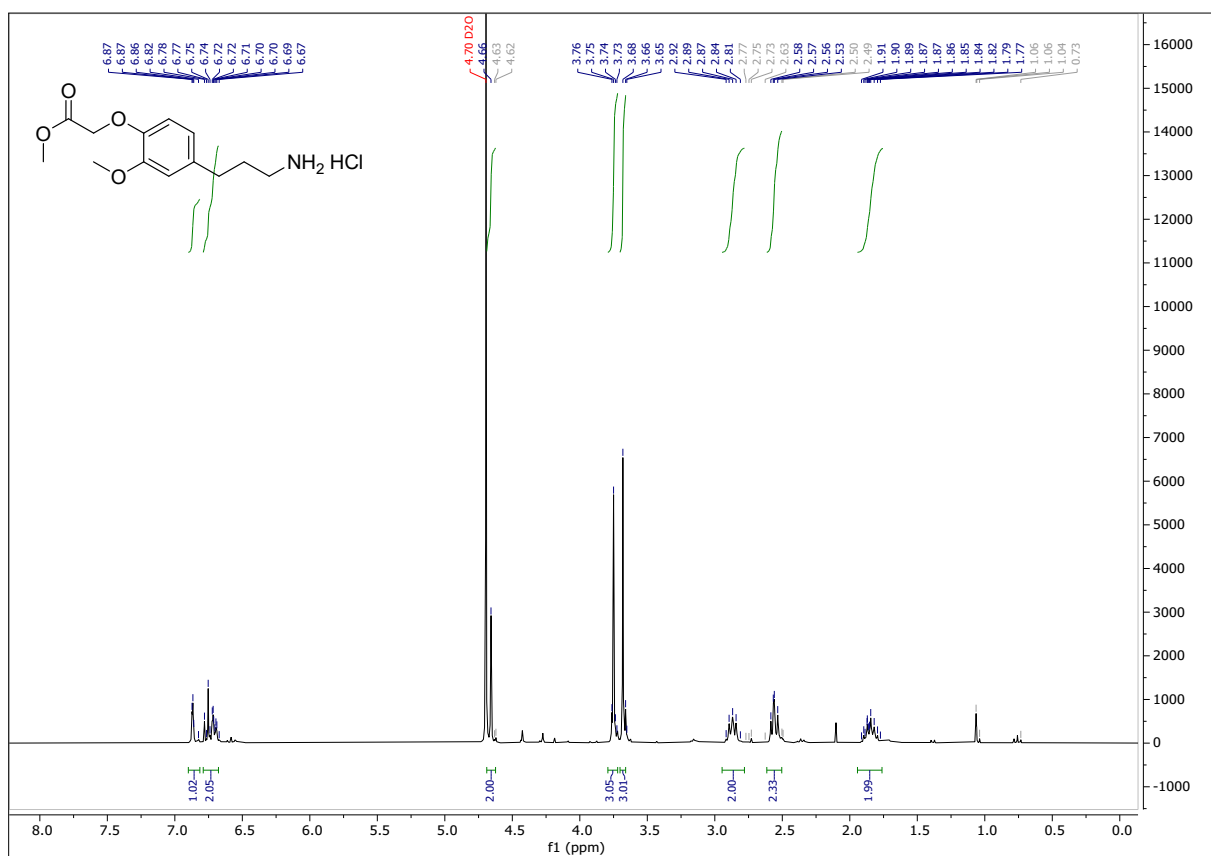

Figure S44. <sup>1</sup>H NMR spectrum of **4B** (as the HCl ammonium salt)

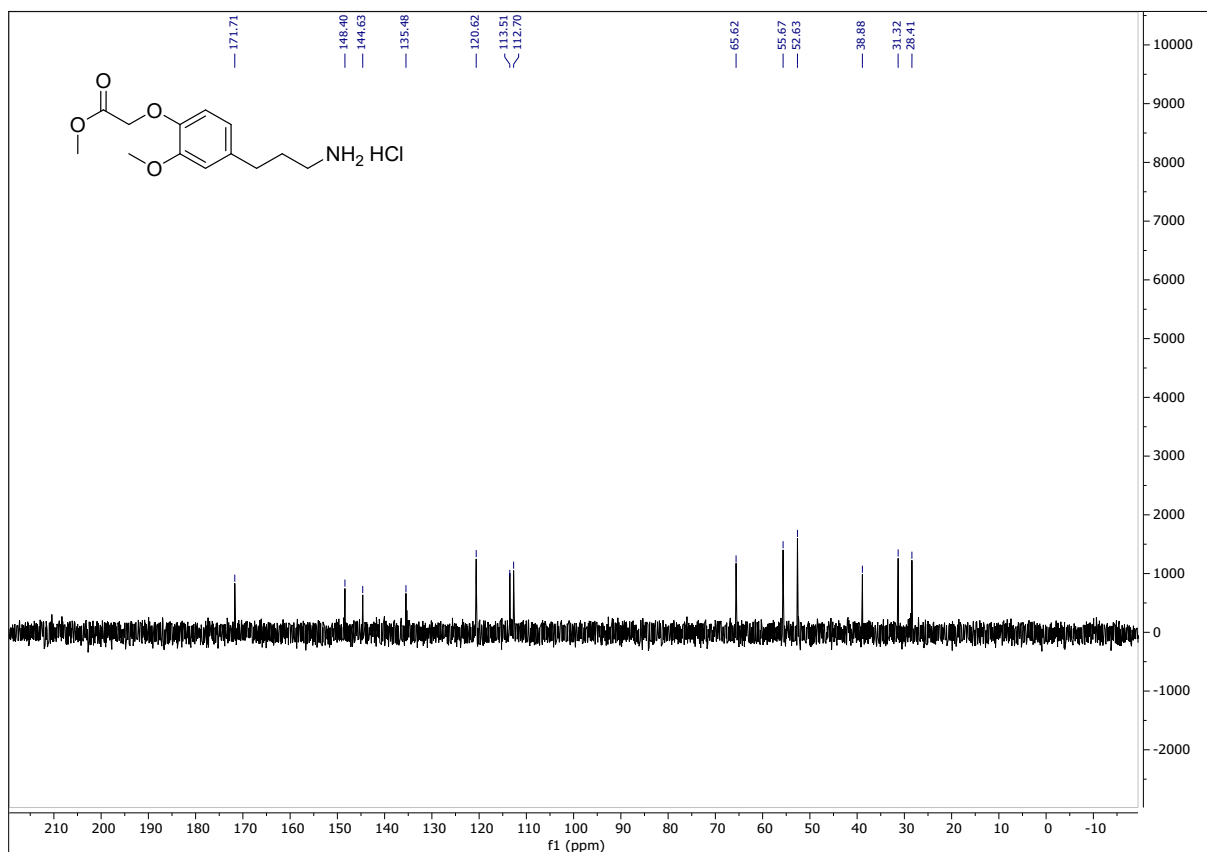

Figure S45. <sup>13</sup>C NMR spectrum of **4B** (as the HCl ammonium salt)

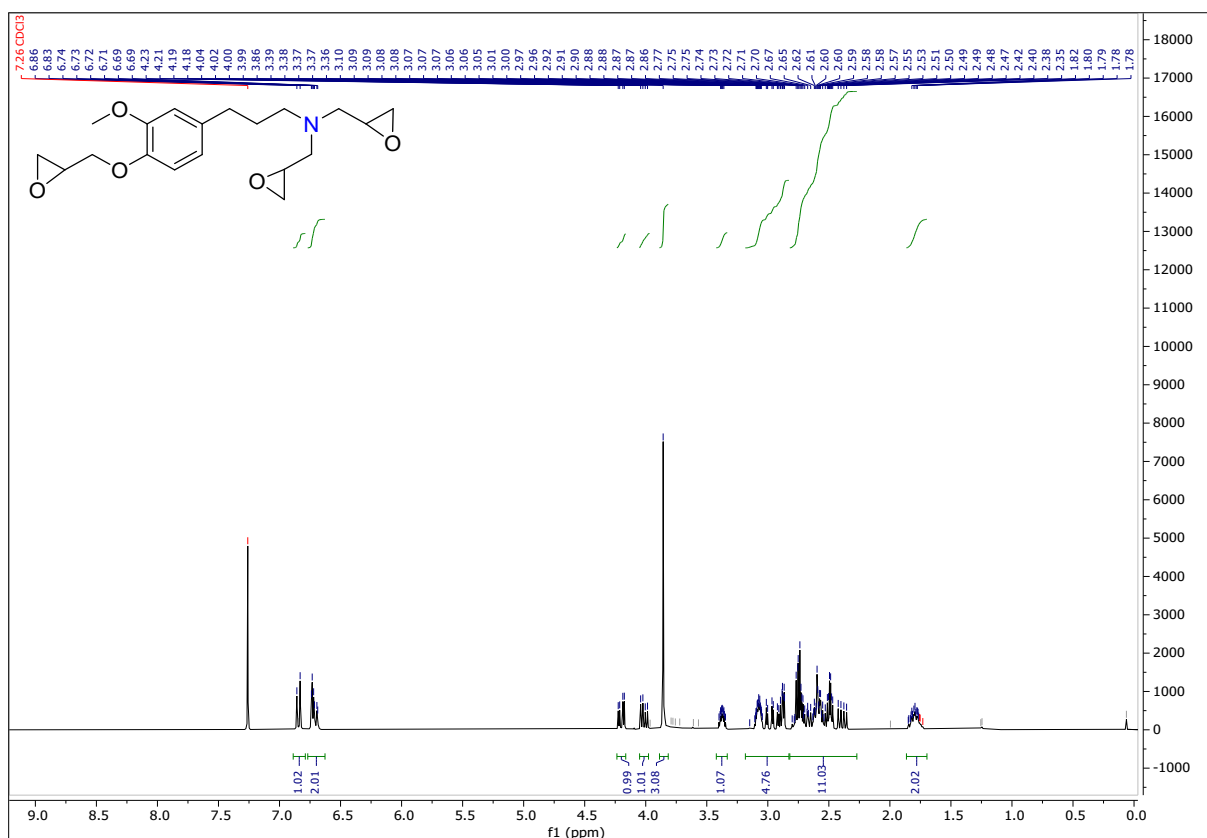

Figure S46. <sup>1</sup>H NMR spectrum of **5B**

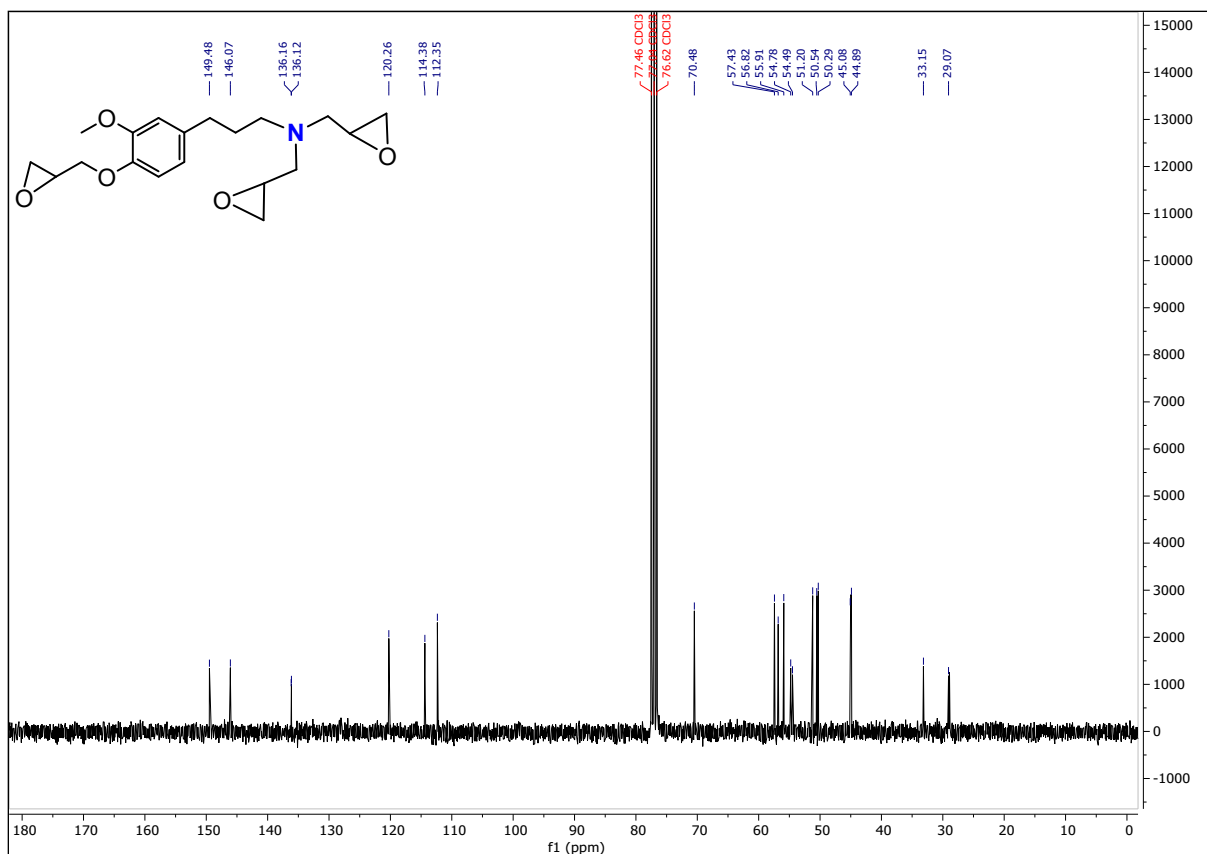

Figure S47. <sup>13</sup>C NMR spectrum of 5B

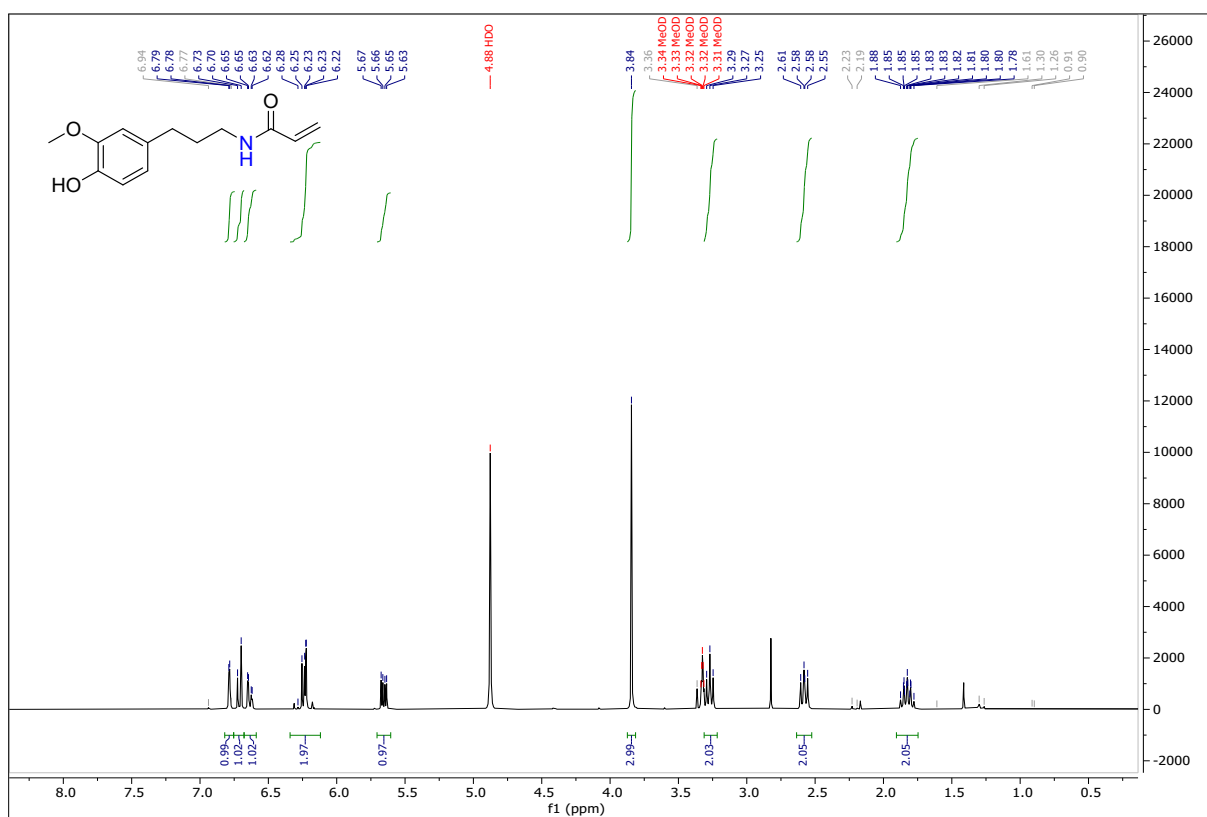

Figure S48. <sup>1</sup>H NMR spectrum of 6B

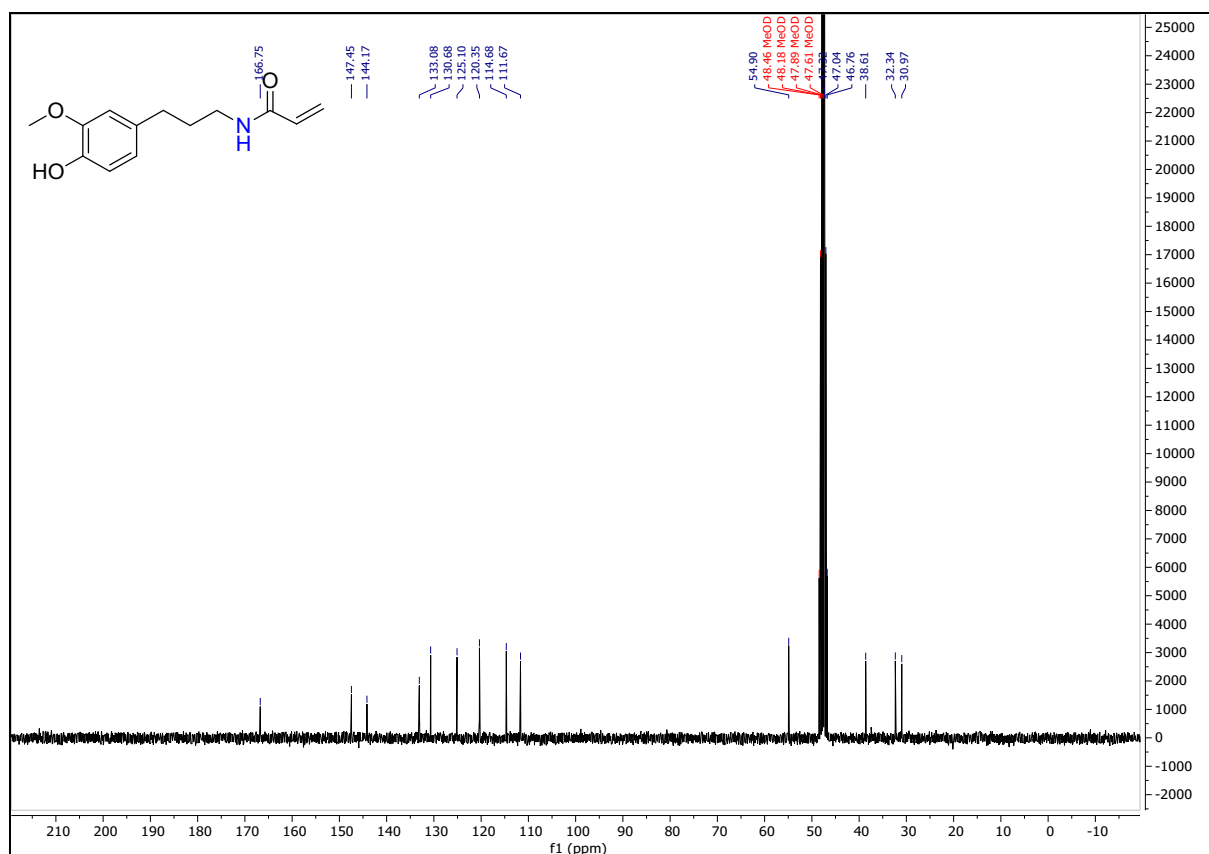

Figure S49. <sup>13</sup>C NMR spectrum of **6B**

## 5. List of the spectral and spectrometric data of the isolated compounds

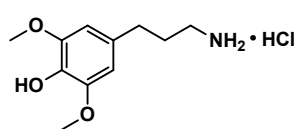

4-(3-Aminopropyl)-2,6-dimethoxyphenol hydrochloride (**1SA**), isolated yield: 64.5 %. <sup>1</sup>H NMR (300 MHz, D<sub>2</sub>O) δ 6.52 (s, 2H), 3.73 (s, 6H), 2.93 – 2.82 (m, 2H), 2.54 (t, *J* = 7.6 Hz, 2H), 1.85 (h, *J* = 7.6, 7.1 Hz, 2H). <sup>13</sup>C

NMR (75 MHz, D<sub>2</sub>O) δ 147.68, 132.83, 132.08, 105.84, 56.23, 38.90, 31.79, 28.52. **HRMS** (APCI<sup>+</sup>, *m/z*) calculated for (M-H)<sup>-</sup> 246.089759; found: 246.090245.

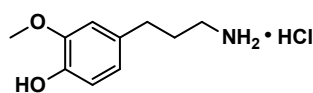

4-(3-Aminopropyl)-2-methoxyphenol hydrochloride (**1GA**), isolated yield: 75.8 %. <sup>1</sup>H NMR (300 MHz, D<sub>2</sub>O) δ 6.82 (d, *J* = 2.0 Hz, 1H), 6.75 (d, *J* = 8.1 Hz, 1H), 6.65 (dd, *J* = 8.1, 2.0 Hz, 1H), 3.73 (s, 3H), 2.92 – 2.79 (m, 2H), 2.53 (t, *J* = 7.6 Hz, 2H),

1.83 (tt, *J* = 9.1, 6.8 Hz, 2H). <sup>13</sup>C NMR (75 MHz, D<sub>2</sub>O) δ 147.31, 142.98, 133.53, 120.96, 115.43, 112.71, 55.85, 38.91, 31.29, 28.55. **HRMS** (APCI<sup>+</sup>, *m/z*) calculated for (M-H)<sup>-</sup> 216.079076; found: 216.07968.

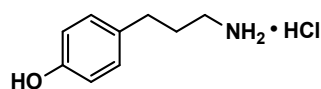

4-(3-Aminopropyl)phenol hydrochloride (**1HA**), isolated yield: 53.4 %. <sup>1</sup>H NMR (300 MHz, D<sub>2</sub>O) δ 7.10 – 6.97 (d, 2H), 6.79 – 6.68 (d, 2H), 2.85 (t, *J* = 7.7 Hz, 2H), 2.51 (t, *J* = 7.7 Hz, 2H), 1.80 (tt, *J* = 9.2, 6.8 Hz, 2H).

$^{13}\text{C}$  NMR (75 MHz,  $\text{D}_2\text{O}$ )  $\delta$  153.67, 132.74, 129.65, 115.37, 38.91, 30.83, 28.59. **HRMS** (APCI $^+$ ,  $m/z$ ) calculated for (M-H) $^-$  186.068999; found: 186.069115.

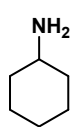

Cyclohexanamine hydrochloride (**1a**), isolated yield: 90.2 %.  $^1\text{H}$  NMR (300 MHz,  $\text{D}_2\text{O}$ )  $\delta$  3.15 – 2.89 (m, 1H), 1.87 (m,  $J$  = 8.7, 4.7 Hz, 2H), 1.78 – 1.61 (m, 2H), 1.59 – 1.47 (m, 1H), 1.32 – 0.98 (m, 5H).  $^{13}\text{C}$  NMR (75 MHz,  $\text{D}_2\text{O}$ )  $\delta$  50.32, 30.28, 24.24, 23.75. **HRMS** (APCI $^+$ ,  $m/z$ ) calculated for (M+Cl) $^-$  170.05049; found: 170.050878.

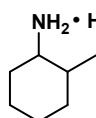

2-Methylcyclohexanamine hydrochloride (**2a**) (20cis/80trans), isolated yield: 68.2 %.  $^1\text{H}$  NMR (300 MHz,  $\text{D}_2\text{O}$ )  $\delta$  3.27 (m,  $J$  = 6.1, 4.1 Hz, 0.2H), 2.70 (m,  $J$  = 11.0, 3.9 Hz, 0.8H), 2.01 – 1.78 (m, 1H), 1.73 – 0.79 (m, 11H).  $^{13}\text{C}$  NMR (75 MHz,  $\text{D}_2\text{O}$ )  $\delta$  56.45, 52.85, 35.78, 33.14, 31.10, 30.58, 24.64, 24.18, 17.56. **HRMS** (APCI $^+$ ,  $m/z$ ) calculated for (M+Cl) $^-$  184.066248; found: 184.066529 (The rest of 5 cis-carbon signals were not detected because of cis in low quantities or overlapping with trans-carbon signals).

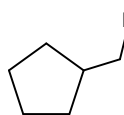

Cyclopentylmethanamine hydrochloride (**3a**), isolated yield: 75.2 %.  $^1\text{H}$  NMR (300 MHz,  $\text{D}_2\text{O}$ )  $\delta$  2.83 (d,  $J$  = 7.6 Hz, 2H), 2.02 (m,  $J$  = 7.9 Hz, 1H), 1.80 – 1.65 (m, 2H), 1.59 – 1.41 (m, 4H), 1.24 – 0.94 (m, 2H).  $^{13}\text{C}$  NMR (75 MHz,  $\text{D}_2\text{O}$ )  $\delta$  44.20, 37.43, 29.66, 24.56. **HRMS** (APCI $^+$ ,  $m/z$ ) calculated for (M+Cl) $^-$  170.05049; found: 170.050878.

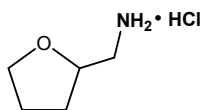

2-Tetrahydrofuran-2-ylmethanamine hydrochloride (**4a**), isolated yield: 45.1 %.  $^1\text{H}$  NMR (300 MHz,  $\text{D}_2\text{O}$ )  $\delta$  4.09 (m,  $J$  = 10.0, 6.7, 3.4 Hz, 1H), 3.83 – 3.65 (m, 2H), 3.07 – 2.98 (m, 1H), 2.87 (dd,  $J$  = 13.2, 8.7 Hz, 1H), 2.09 – 1.93 (m, 1H), 1.93 – 1.74 (m, 2H), 1.60 – 1.47 (m, 1H).  $^{13}\text{C}$  NMR (75 MHz,  $\text{D}_2\text{O}$ )  $\delta$  74.80, 68.24, 42.62, 28.20, 24.91. **HRMS** (APCI $^+$ ,  $m/z$ ) calculated for (M+Cl) $^-$  172.066667; found: 172.066529.

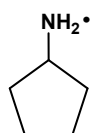

Cyclopentanamine hydrochloride (**5a**), isolated yield: 62.8 %.  $^1\text{H}$  NMR (300 MHz,  $\text{D}_2\text{O}$ )  $\delta$  3.54 (m,  $J$  = 7.2, 5.4 Hz, 1H), 2.01 – 1.87 (m, 2H), 1.69 – 1.43 (m, 6H).  $^{13}\text{C}$  NMR (75 MHz,  $\text{D}_2\text{O}$ )  $\delta$  52.07, 30.49, 23.48. **HRMS** (APCI $^+$ ,  $m/z$ ) calculated for (M+Cl) $^-$  156.035254; found: 156.035228.

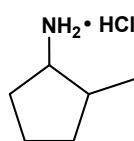

2-Methylcyclopentan-1-amine hydrochloride (**6a**) (22cis/78trans), Isolated yield: 58.6 %.  $^1\text{H}$  NMR (300 MHz,  $\text{D}_2\text{O}$ )  $\delta$  3.47 (m,  $J$  = 6.8, 4.5 Hz, 0.2 H), 3.24 – 2.93 (m, 0.8 H), 2.05 – 0.85 (m, 10H).  $^{13}\text{C}$  NMR (75 MHz,  $\text{D}_2\text{O}$ )  $\delta$  58.45, 55.27, 38.95, 35.72, 32.23, 30.76, 30.03, 29.50, 21.86, 21.32, 17.12, 12.96. **HRMS** (APCI $^+$ ,  $m/z$ ) calculated for (M+Cl) $^-$  170.050853 found: 170.050878.

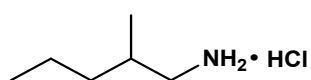

2-Methylpentan-1-amine hydrochloride (**7a**), isolated yield: 54.4 %.  $^1\text{H}$  NMR (300 MHz,  $\text{D}_2\text{O}$ )  $\delta$  2.84 (m,  $J = 12.7, 6.0$  Hz, 1H), 2.68 (m,  $J = 12.7, 7.8$  Hz, 1H), 1.72 (dt,  $J = 11.8, 6.5$  Hz, 1H), 1.33 – 1.04 (m, 4H), 0.80 (dd,  $J = 29.0, 6.8$  Hz, 6H).  $^{13}\text{C}$  NMR (75 MHz,  $\text{D}_2\text{O}$ )  $\delta$  45.03, 35.26, 30.55, 18.94, 16.08, 13.22. **HRMS** (APCI $^+$ ,  $m/z$ ) calculated for (M+Cl) $^-$  172.067; found: 172.066529.

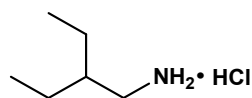

2-Ethylbutanamine hydrochloride (**8a**), isolated yield: 51.6 %.  $^1\text{H}$  NMR (300 MHz,  $\text{D}_2\text{O}$ )  $\delta$  2.83 (d,  $J = 6.6$  Hz, 2H), 1.48 (m,  $J = 6.5$  Hz, 1H), 1.37 – 1.20 (m, 4H), 0.76 (t,  $J = 7.4$  Hz, 6H).  $^{13}\text{C}$  NMR (75 MHz,  $\text{D}_2\text{O}$ )  $\delta$  41.92, 38.39, 22.31, 9.52. **HRMS** (APCI $^+$ ,  $m/z$ ) calculated for (M+Cl) $^-$  172.066667; found: 172.066529.

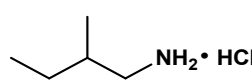

2-Methylbutanamine hydrochloride (**9a**), isolated yield: 43.5 %.  $^1\text{H}$  NMR (300 MHz,  $\text{D}_2\text{O}$ )  $\delta$  2.85 (m,  $J = 12.7, 6.1$  Hz, 1H), 2.68 (m,  $J = 12.7, 7.8$  Hz, 1H), 1.71 – 1.53 (m, 1H), 1.31 (m,  $J = 13.0, 7.5, 5.5$  Hz, 1H), 1.21 – 1.04 (m, 1H), 0.89 – 0.70 (m, 6H).  $^{13}\text{C}$  NMR (75 MHz,  $\text{D}_2\text{O}$ )  $\delta$  44.68, 32.46, 25.92, 15.71, 10.04. **HRMS** (APCI $^+$ ,  $m/z$ ) calculated for (M+Cl) $^-$  158.050786; found: 158.050878.

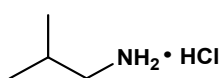

2-Methylpropanamine hydrochloride (**10a**), isolated yield: 43.8 %.  $^1\text{H}$  NMR (300 MHz,  $\text{D}_2\text{O}$ )  $\delta$  2.72 (d,  $J = 7.2$  Hz, 2H), 1.83 (m,  $J = 13.7, 6.8$  Hz, 1H), 0.86 (d,  $J = 6.7$  Hz, 6H).  $^{13}\text{C}$  NMR (75 MHz,  $\text{D}_2\text{O}$ )  $\delta$  46.28, 26.22, 18.77. **HRMS** (APCI $^+$ ,  $m/z$ ) calculated for (M+Cl) $^-$  144.035296; found: 144.035228.

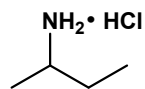

2-Butanamine hydrochloride (**11a**), isolated yield: 44.4 %.  $^1\text{H}$  NMR (300 MHz,  $\text{D}_2\text{O}$ )  $\delta$  3.17 (m,  $J = 6.7$  Hz, 1H), 1.66 – 1.37 (m, 2H), 1.16 (d,  $J = 6.7$  Hz, 3H), 0.84 (t,  $J = 7.5$  Hz, 3H).  $^{13}\text{C}$  NMR (75 MHz,  $\text{D}_2\text{O}$ )  $\delta$  49.14, 27.10, 17.15, 8.91. **HRMS** (APCI $^+$ ,  $m/z$ ) calculated for (M+Cl) $^-$  144.03498; found: 144.035228.

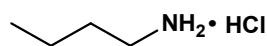

2-Butanamine hydrochloride (**12a**), isolated yield: 51.8 %.  $^1\text{H}$  NMR (300 MHz,  $\text{D}_2\text{O}$ )  $\delta$  2.97 – 2.80 (t, 2H), 1.60 – 1.44 (m, 2H), 1.36 – 1.18 (m, 2H), 0.81 (t,  $J = 7.4$  Hz, 3H).  $^{13}\text{C}$  NMR (75 MHz,  $\text{D}_2\text{O}$ )  $\delta$  39.17, 28.67, 18.91, 12.66. **HRMS** (APCI $^+$ ,  $m/z$ ) calculated for (M+Cl) $^-$  144.035425; found: 144.035228.

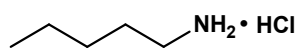

Pentanamine hydrochloride (**13a**), isolated yield: 64.2 %.  $^1\text{H}$  NMR (300 MHz,  $\text{D}_2\text{O}$ )  $\delta$  2.87 (t,  $J = 7.6$  Hz, 2H), 1.54 (m,  $J = 7.5$  Hz, 2H), 1.23 (m,  $J = 7.7, 4.0$  Hz, 4H), 0.86 – 0.69 (m, 3H).  $^{13}\text{C}$  NMR (75 MHz,  $\text{D}_2\text{O}$ )  $\delta$  39.43, 27.65, 26.30, 21.39, 13.00. **HRMS** (APCI $^+$ ,  $m/z$ ) calculated for (M+Cl) $^-$  158.051083; found: 158.050878.



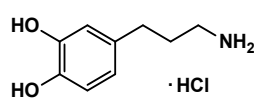

4-(3-aminopropyl)benzene-1,2-diol hydrochloride (**1B**), isolated yield: 92 %.  $^1\text{H}$  NMR (300 MHz,  $\text{D}_2\text{O}$ )  $\delta$  6.74 (d,  $J$  = 8.1 Hz, 1H), 6.69 (d,  $J$  = 2.1 Hz, 1H), 6.59 (dd,  $J$  = 8.0, 2.2 Hz, 1H), 2.91 – 2.77 (m, 2H), 2.48 (t,  $J$  = 7.6 Hz, 2H), 1.80 (m,  $J$  = 9.2, 6.9 Hz, 2H).  $^{13}\text{C}$  NMR (75 MHz,  $\text{D}_2\text{O}$ )  $\delta$  143.89, 142.09, 133.69, 120.57, 116.24, 116.11, 38.93, 30.99, 28.48. **HRMS** (APCI<sup>+</sup>,  $m/z$ ) calculated for (M+H)<sup>+</sup> 168.102073; found: 168.101905

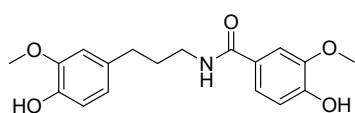

4-hydroxy-N-(3-(4-hydroxy-3-methoxyphenyl)propyl)-3-methoxybenzamide (**2B**), isolated yield: 94.8 %.  $^1\text{H}$  NMR (300 MHz, MeOH- $d_4$ )  $\delta$  7.42 (d,  $J$  = 2.1 Hz, 1H), 7.33 (dd,  $J$  = 8.3, 2.1 Hz, 1H), 6.88 – 6.79 (m, 2H), 6.74 – 6.63 (m, 2H), 3.91 (s, 3H), 3.83 (s, 3H), 3.39 (t,  $J$  = 7.1 Hz, 2H), 2.63 (t,  $J$  = 7.6 Hz, 2H), 1.98 – 1.86 (m, 2H).  $^{13}\text{C}$  NMR (75 MHz, MeOH- $d_4$ )  $\delta$  168.66, 149.75, 147.46, 147.37, 144.18, 133.27, 133.58, 120.50, 120.37, 114.69, 114.40, 111.69, 110.46, 55.01, 54.90, 39.33, 32.58, 31.15. **HRMS** (APCI<sup>+</sup>,  $m/z$ ) calculated for (M+H)<sup>+</sup> 332.149507; found: 332.149249.

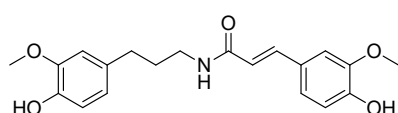

(E)-3-(4-hydroxy-3-methoxyphenyl)-N-(3-(4-hydroxy-3-methoxyphenyl)propyl)acrylamide (**3B**), isolated yield: 83.0 %.  $^1\text{H}$  NMR (300 MHz, MeOH- $d_4$ )  $\delta$  7.51 – 7.41 (d, 1H), 7.13 (d,  $J$  = 2.0 Hz, 1H), 7.03 (dd,  $J$  = 8.3, 2.0 Hz, 1H), 6.83 – 6.64 (dd, 4H), 6.45 (d,  $J$  = 15.7 Hz, 1H), 3.86 (d,  $J$  = 15.1 Hz, 6H), 3.30 (d,  $J$  = 6.9 Hz, 2H), 2.59 (q,  $J$  = 7.1 Hz, 2H), 1.85 (m,  $J$  = 8.9, 6.8 Hz, 2H).  $^{13}\text{C}$  NMR (75 MHz, MeOH- $d_4$ )  $\delta$  167.80, 148.41, 147.87, 147.46, 144.20, 140.56, 133.13, 126.87, 121.79, 120.39, 117.39, 115.06, 114.71, 111.70, 110.08, 54.96, 54.92, 46.77, 38.76, 32.41. **HRMS** (APCI<sup>+</sup>,  $m/z$ ) calculated for (M+H)<sup>+</sup> 358.165323; found: 358.164899

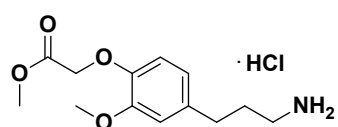

Methyl 2-(4-(3-aminopropyl)-2-methoxyphenoxy)acetate hydrochloride (**4B**), isolated yield: 61.2 %.  $^1\text{H}$  NMR (300 MHz,  $\text{D}_2\text{O}$ )  $\delta$  6.87 (d,  $J$  = 1.9 Hz, 1H), 6.79 – 6.68 (m, 2H), 4.66 (s, 2H), 3.75 (s, 3H), 3.68 (s, 3H), 2.88 (q,  $J$  = 7.7, 7.1 Hz, 2H), 2.61 – 2.50 (m, 2H), 1.85 (m,  $J$  = 7.4 Hz, 2H).  $^{13}\text{C}$  NMR (75 MHz,  $\text{D}_2\text{O}$ )  $\delta$  171.71, 148.40, 144.63, 135.48, 120.62, 113.51, 112.70, 65.62, 55.67, 52.63, 38.88, 31.32, 28.41. **HRMS** (APCI<sup>+</sup>,  $m/z$ ) calculated for (M+H)<sup>+</sup> 254.13895; found: 254.138685.

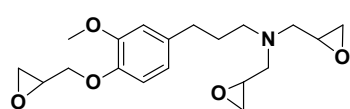

3-(3-methoxy-4-(oxiran-2-ylmethoxy)phenyl)-N,N-bis(oxiran-2-ylmethyl)propan-1-amine (**5B**), isolated yield: 34.8 %.  $^1\text{H}$  NMR (300 MHz,  $\text{CDCl}_3$ )  $\delta$  6.84 (d,  $J$  = 8.0 Hz, 1H), 6.77 – 6.63 (m, 2H), 4.20 (dd,  $J$  = 11.4, 3.6 Hz, 1H), 4.01 (dd,  $J$  = 11.4, 5.5 Hz, 1H), 3.86 (s, 3H), 3.37 (m,  $J$  = 5.5, 3.9, 2.6 Hz, 1H), 3.18 – 2.83 (m, 5H), 2.82 – 2.27 (m, 11H), 1.80 (m,  $J$  = 7.1, 3.2, 1.4 Hz, 2H).  $^{13}\text{C}$  NMR (75 MHz,  $\text{CDCl}_3$ )  $\delta$  149.48, 146.07, 136.16, 136.12, 120.26, 114.38, 112.35, 77.24, 70.48, 57.43, 56.82, 55.91, 54.78, 54.49, 51.20, 50.54, 50.29, 45.08, 45.01, 44.89, 33.15, 33.11, 29.07, 28.91.

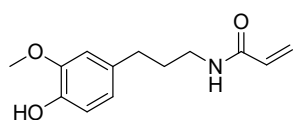

N-(3-(4-hydroxy-3-methoxyphenyl)propyl)acrylamide (**6B**), isolated yield: 85.2 %.  $^1\text{H}$  NMR (300 MHz, MeOH- $d_4$ )  $\delta$  6.79 (d,  $J = 1.9$  Hz, 1H), 6.71 (d,  $J = 8.0$  Hz, 1H), 6.64 (dd,  $J = 8.0, 2.0$  Hz, 1H), 6.34 – 6.12 (m, 2H), 5.65 (dd,  $J = 8.3, 3.7$  Hz, 1H), 3.84 (s, 3H), 3.27 (t,  $J = 7.1$  Hz, 2H), 2.58 (dd,  $J = 8.5, 6.8$  Hz, 2H), 1.83 (m,  $J = 7.6, 6.5$  Hz, 2H).  $^{13}\text{C}$  NMR (75 MHz, MeOH- $d_4$ )  $^{13}\text{C}$  NMR (75 MHz,  $\text{CDCl}_3$ )  $\delta$  149.48, 146.07, 136.12, 120.26, 114.38, 112.35, 70.48, 57.43, 56.82, 55.91, 54.78, 54.49, 51.20, 50.54, 50.29, 45.08, 44.89, 33.15, 29.07.
